# Supplementary material
Source: publisher figshare collection journal article supplement (https://geolsoc.figshare.com/ndownloader/files/33321867)
Supplement: Supplementary file 1 [file 33321867]

## **Appendix A**

Sedimentary logs based on fieldwork

## Symbols used in graphic logs

### Sedimentary structures

- Massive/structureless
- Trough x-bedding
- Tabular x-bedding
- Sigmoidal x-bedding
- Planar parallel-bedding /lamination
- Wavy bedding
- Hummocky x-bedding
- Swaley x-bedding
- Current ripple x-lamination
- Wave ripple x-lamination
- Soft-sediment deformation
- Load casts
- Contorted mud lamina

- Convolute bedding
- Water-escape structure
- Desiccation cracks
- Minor fault
- Mud lamina
- Mud clasts
- Mud trace
- Siderite nodule

### Fossils/Trace fossils

- Bioturbation
- Diplocraterion
- Rootlets
- Carbonaceous flakes
- Lignite fragments

- Fossil shells
- Plant leaf
- Oil trace

### Facies associations

- Sandstone dominated channel deposits
- Tidally influ. heterolithic channel dep.
- Crevasse splay sandstone deposits
- Overbank mudstone deposits
- Mudstone dominated channel deposits
- Marine sandstone
- Marine heterolithic
- Marine mudtone
- Marine limestone

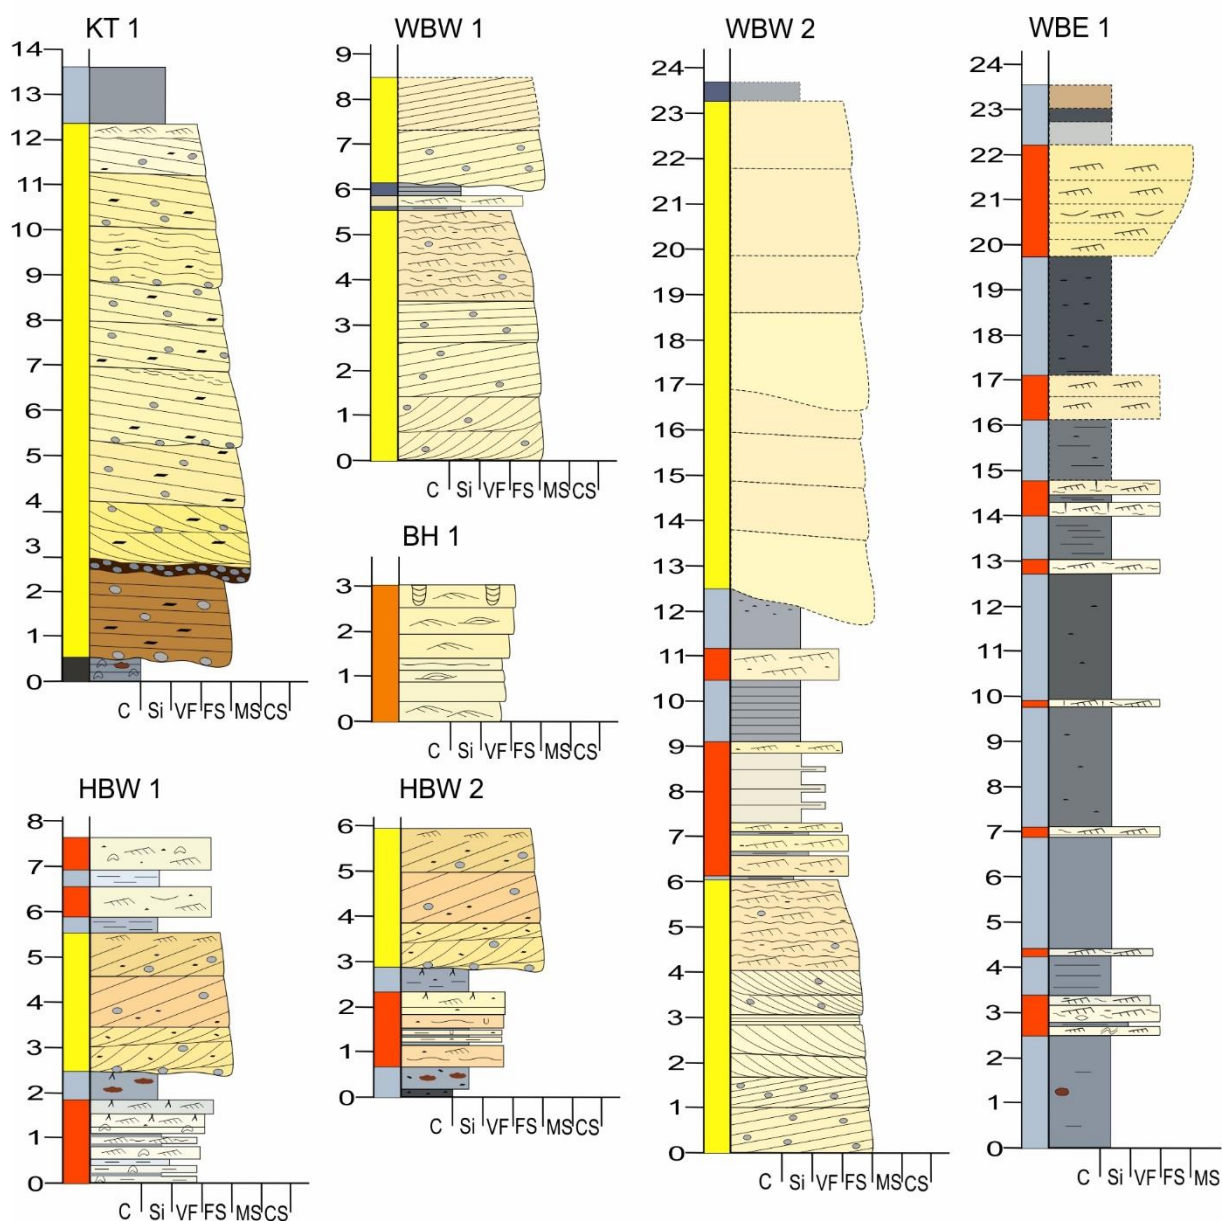

KT= Kettleless; WBW= Whitby West; WBE= Whitby East; BH= Beacon Hill; HBW= Hayburn Wyke

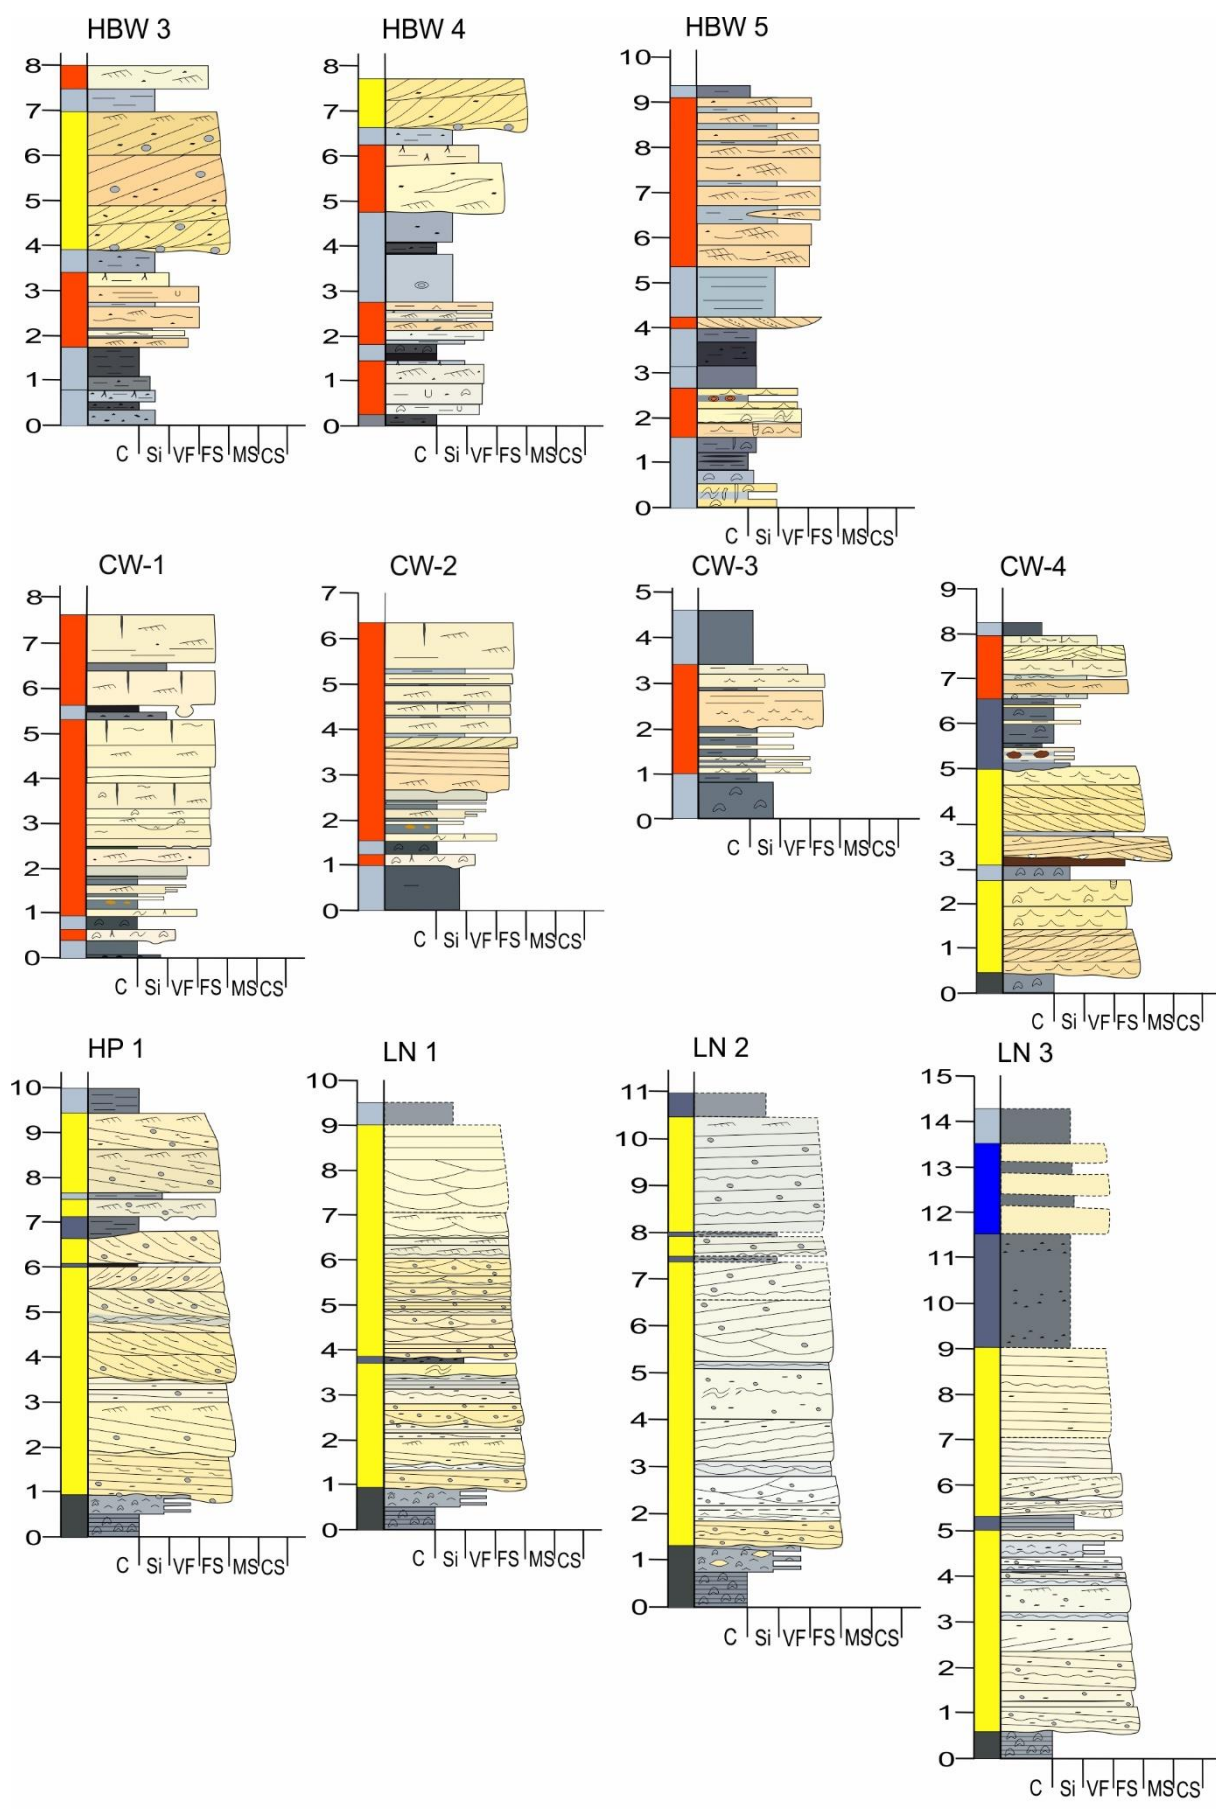

HBW= Hayburn Wyke; CW= Cloughton Wyke; HP= Hundle Point; LN= Long Nab

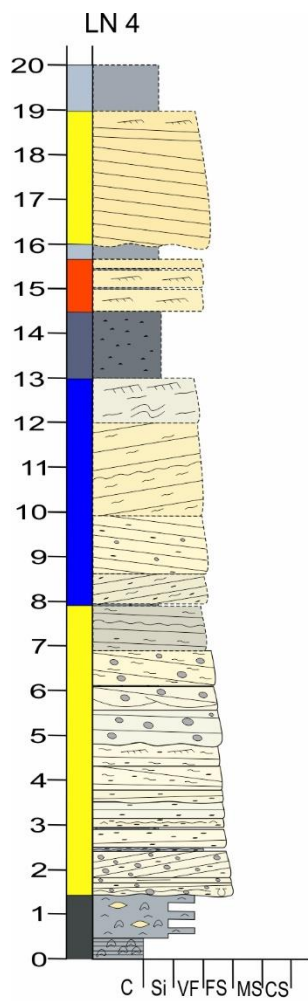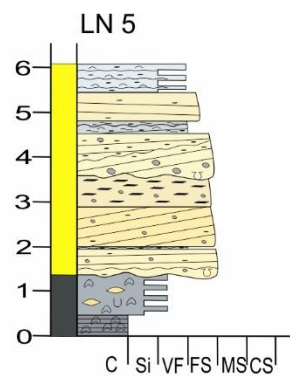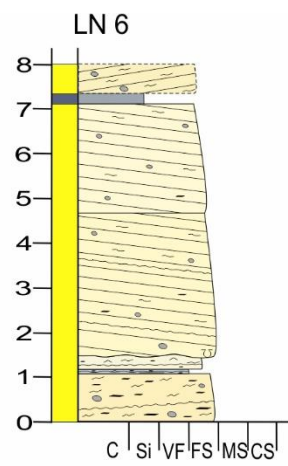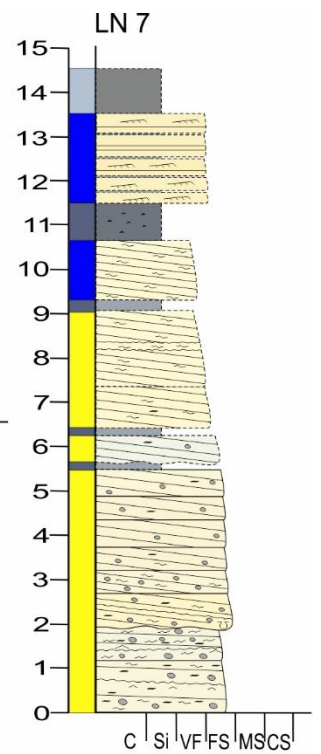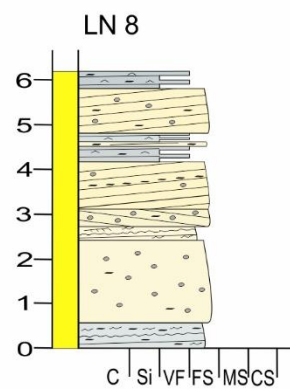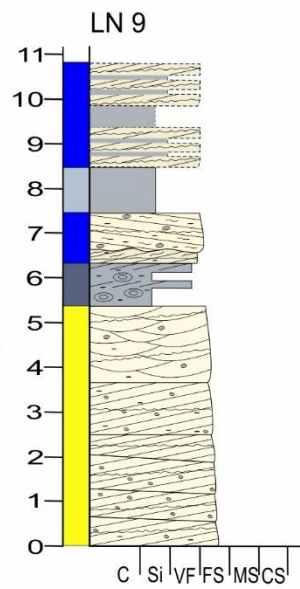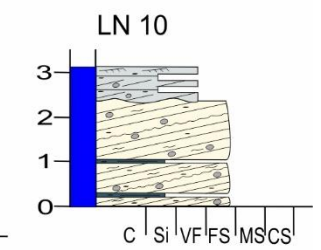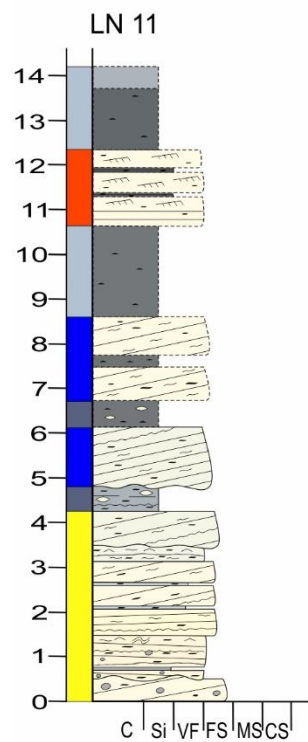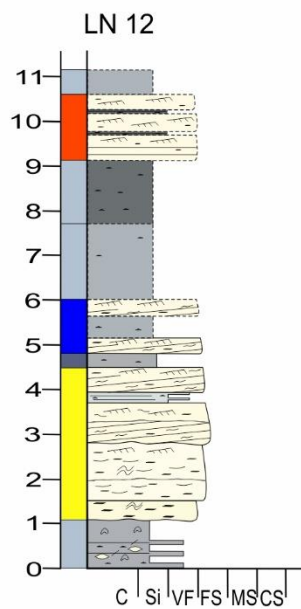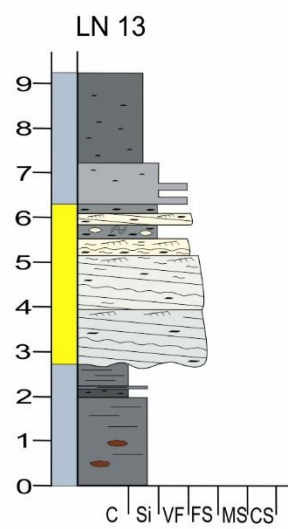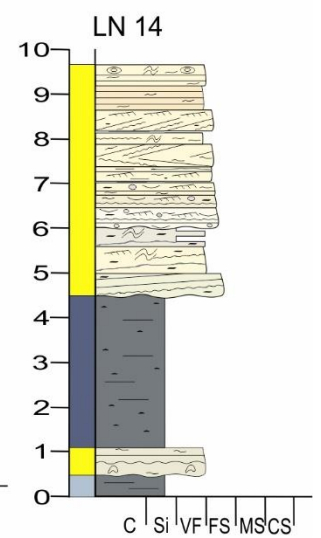

LN= Long Nab



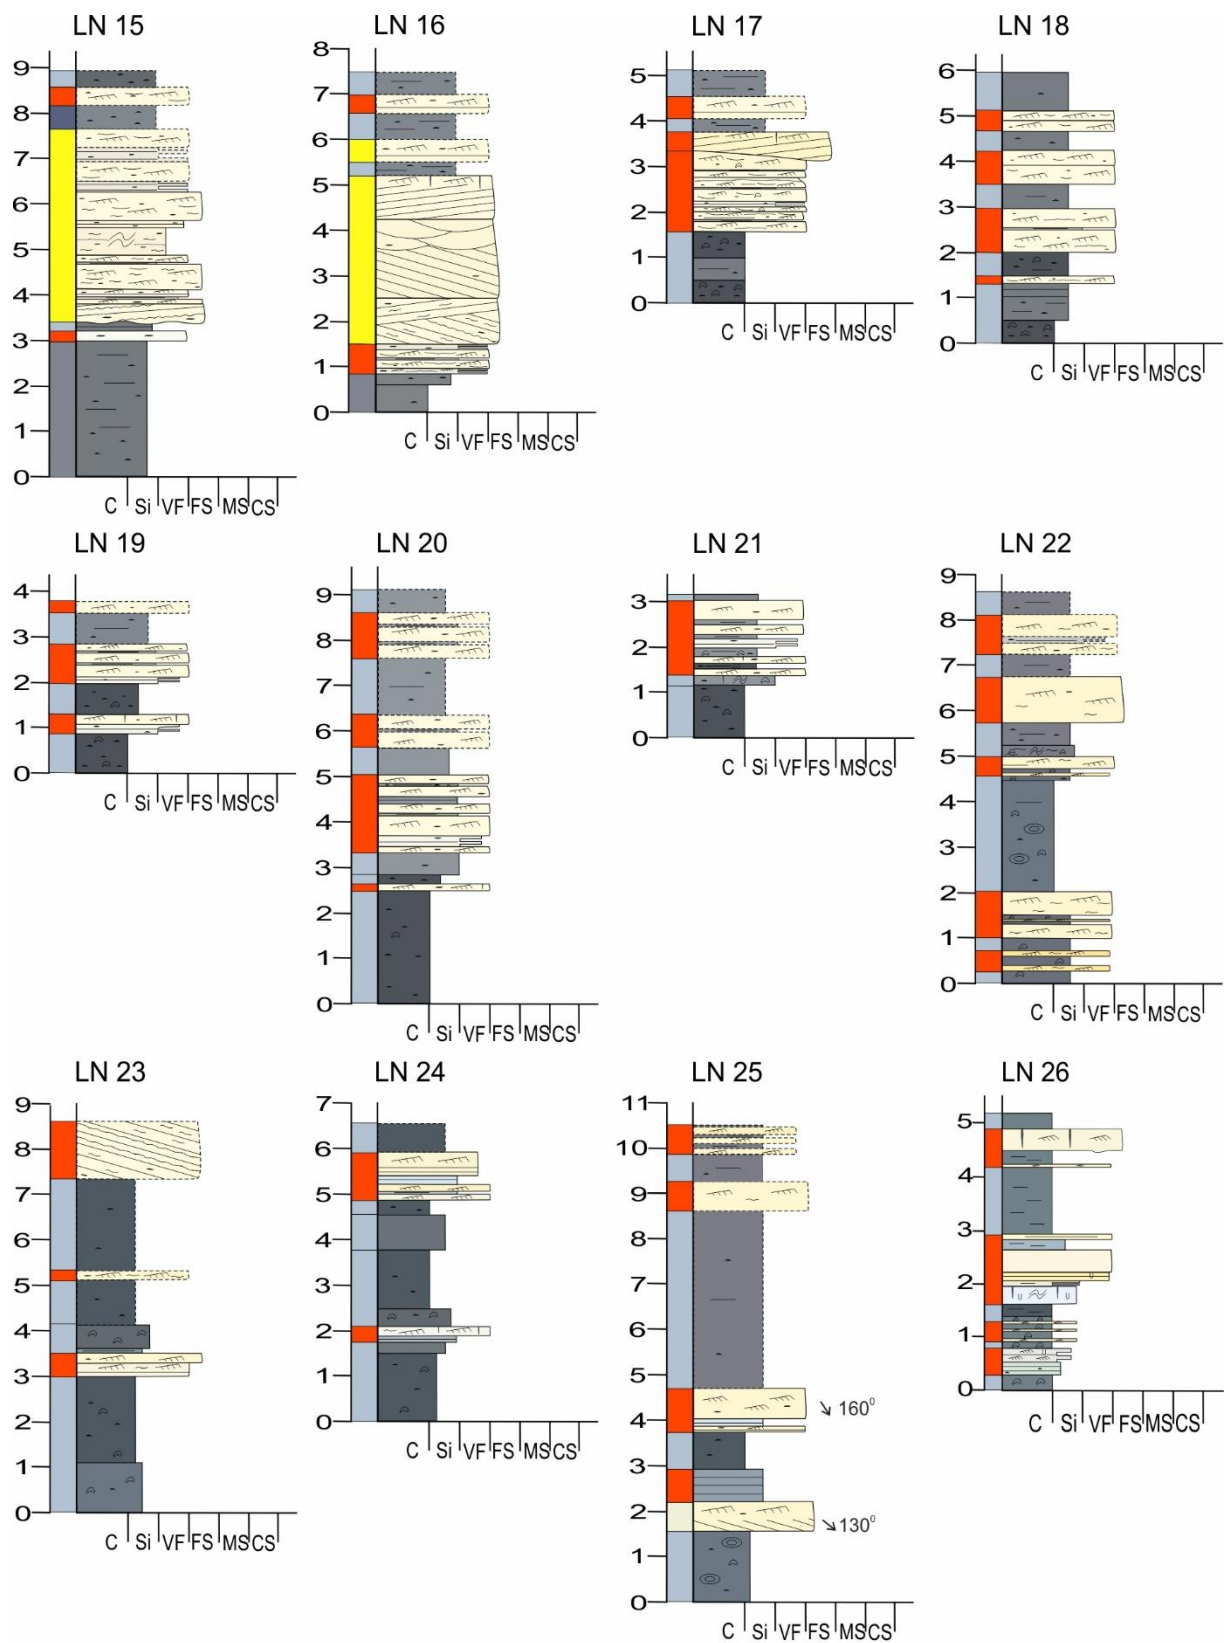

LN= Long Nab

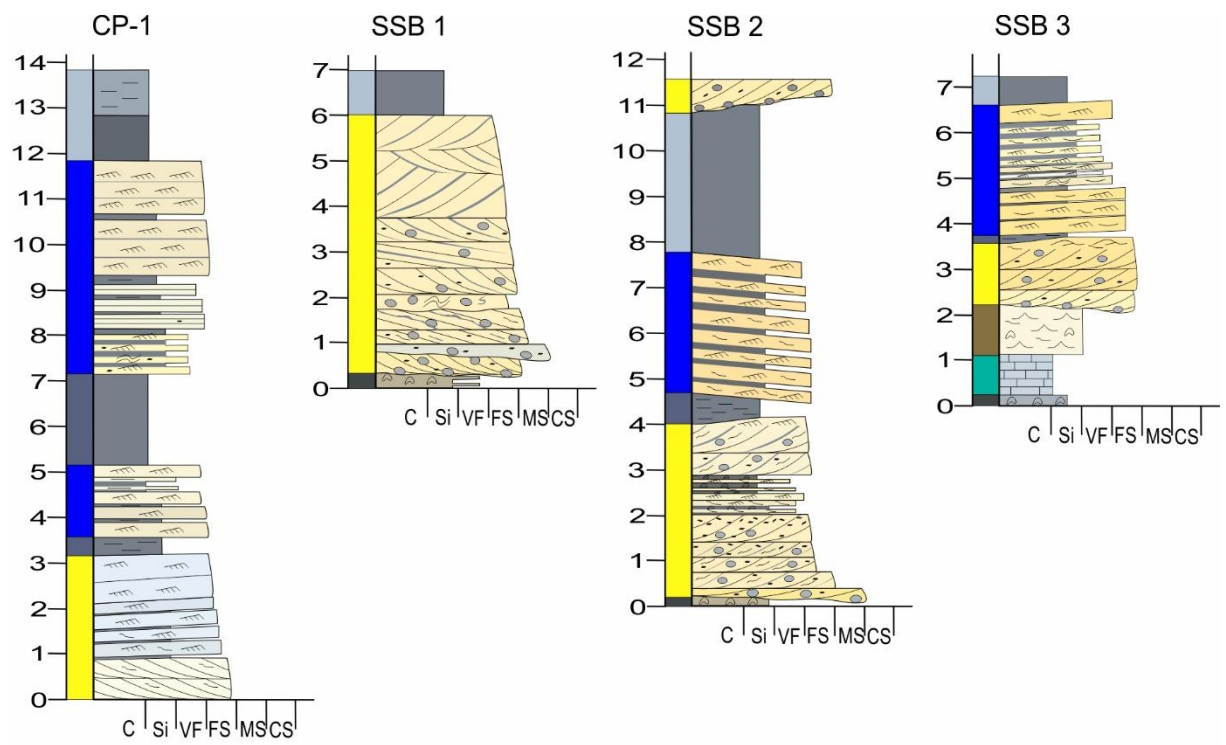

CP = Cromer Point; SSB= Scarborough South Bay

## **Appendix B**

Sedimentary logs based on the core sections with facies proportions

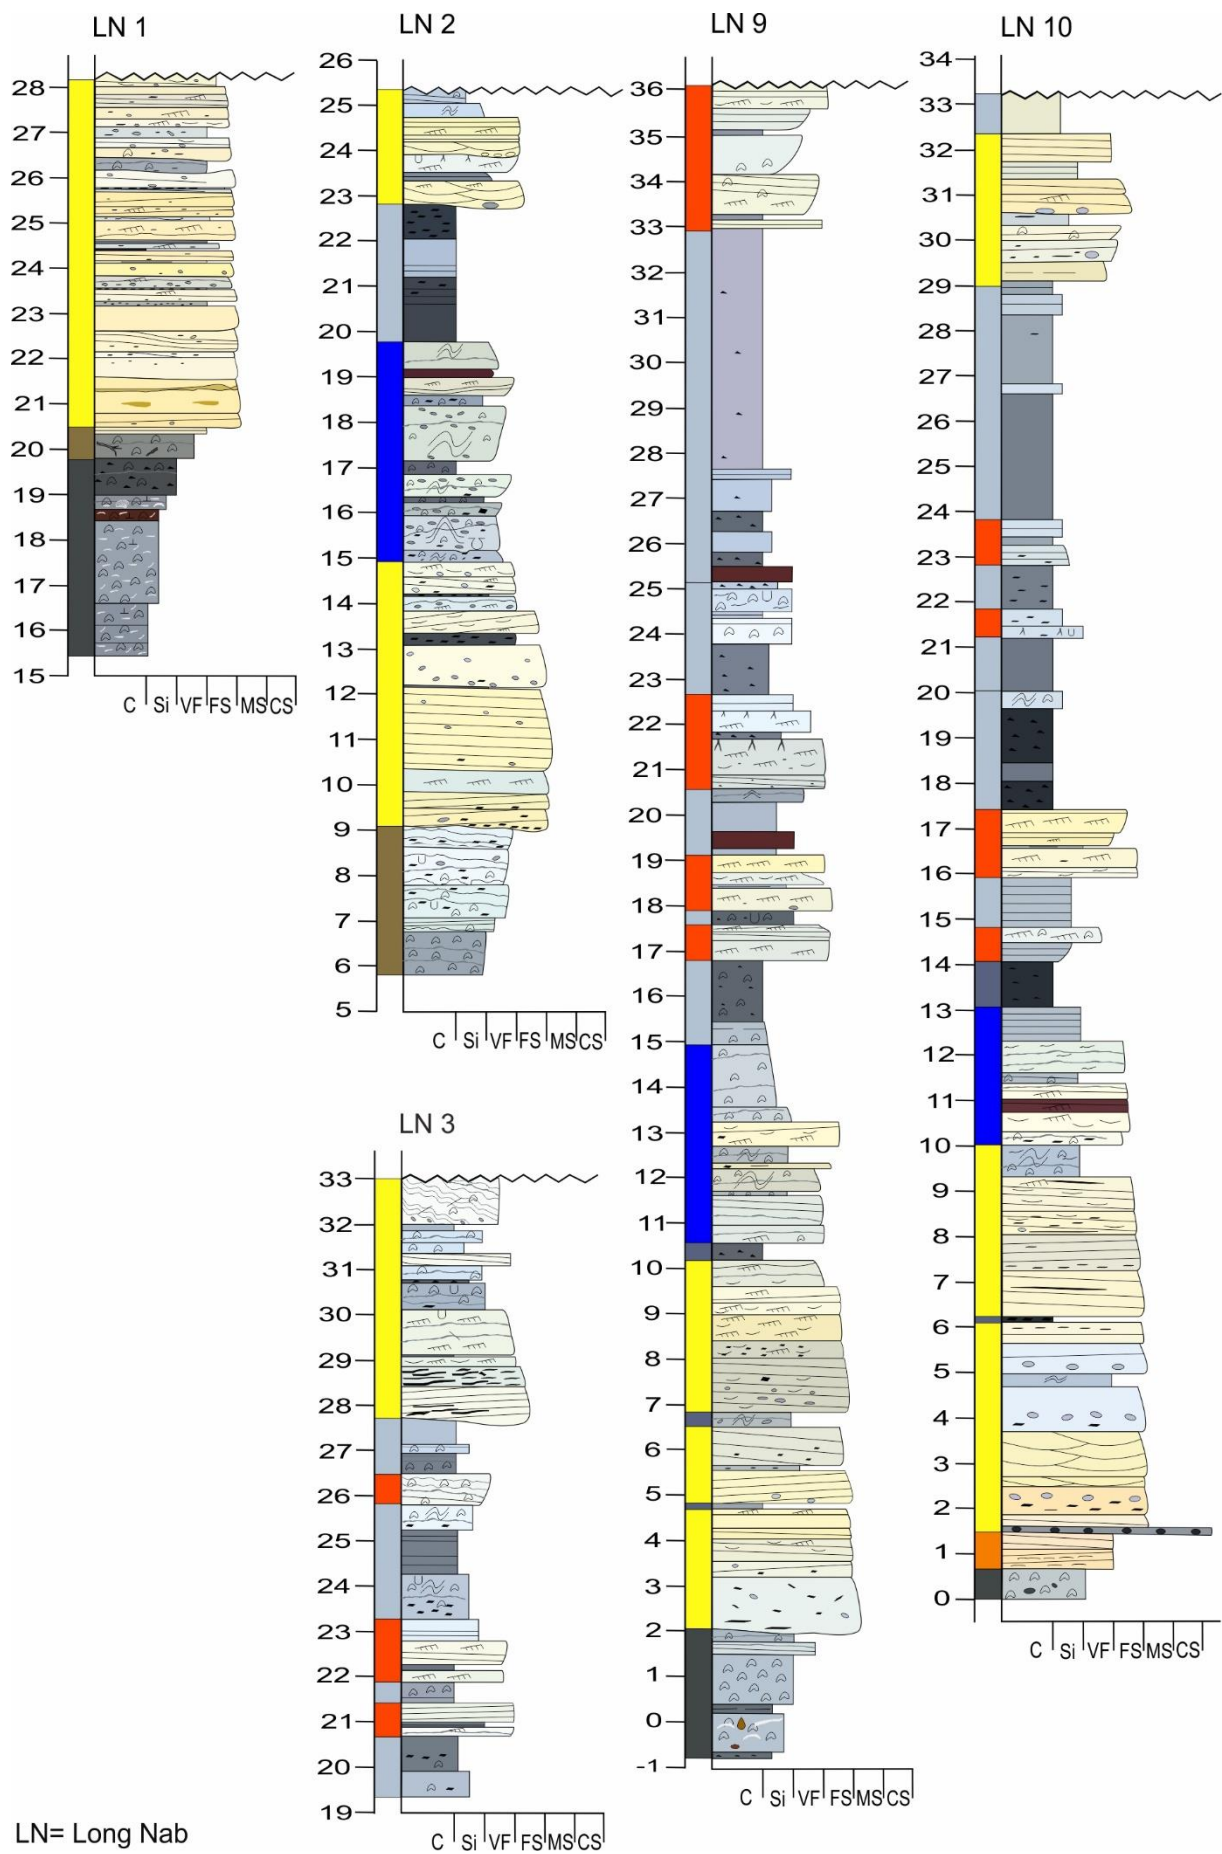



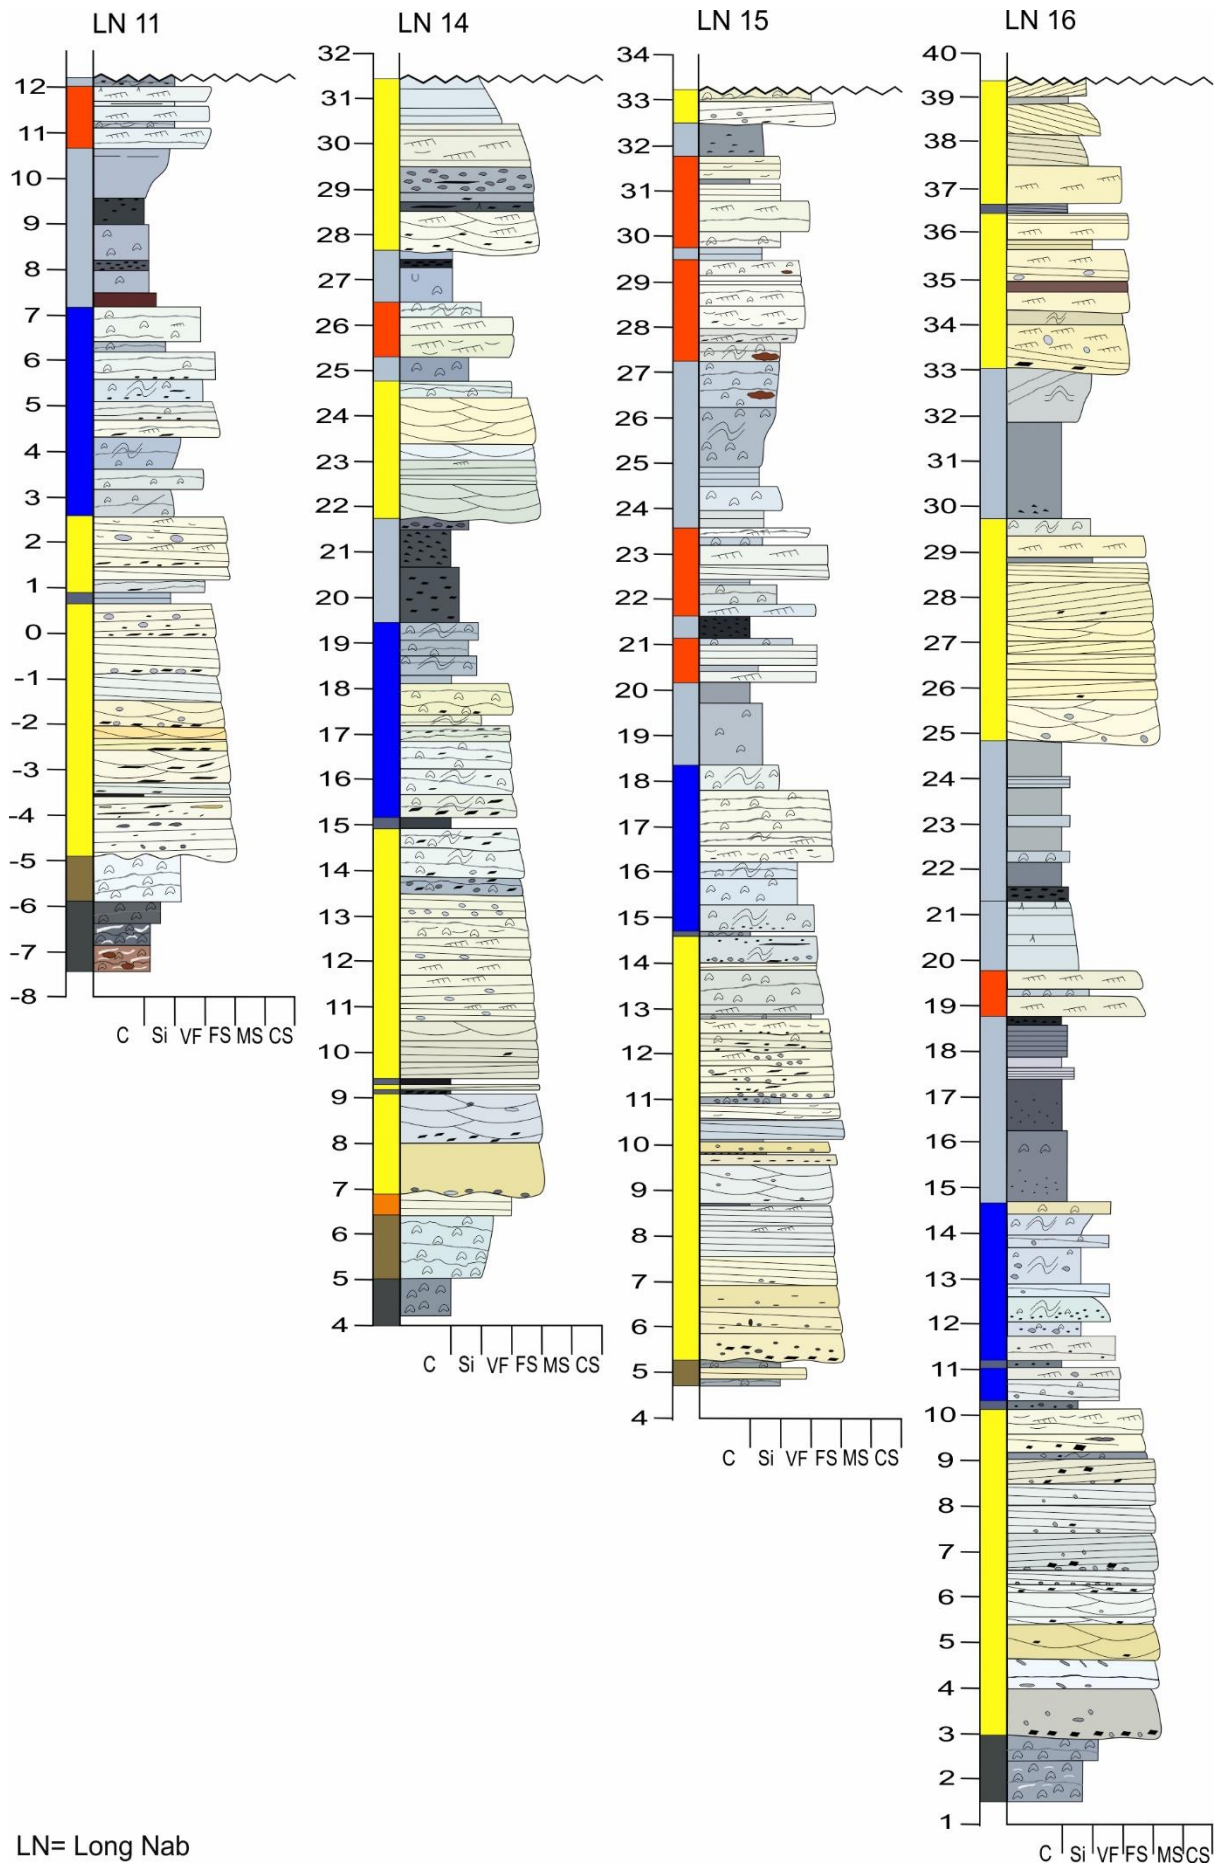

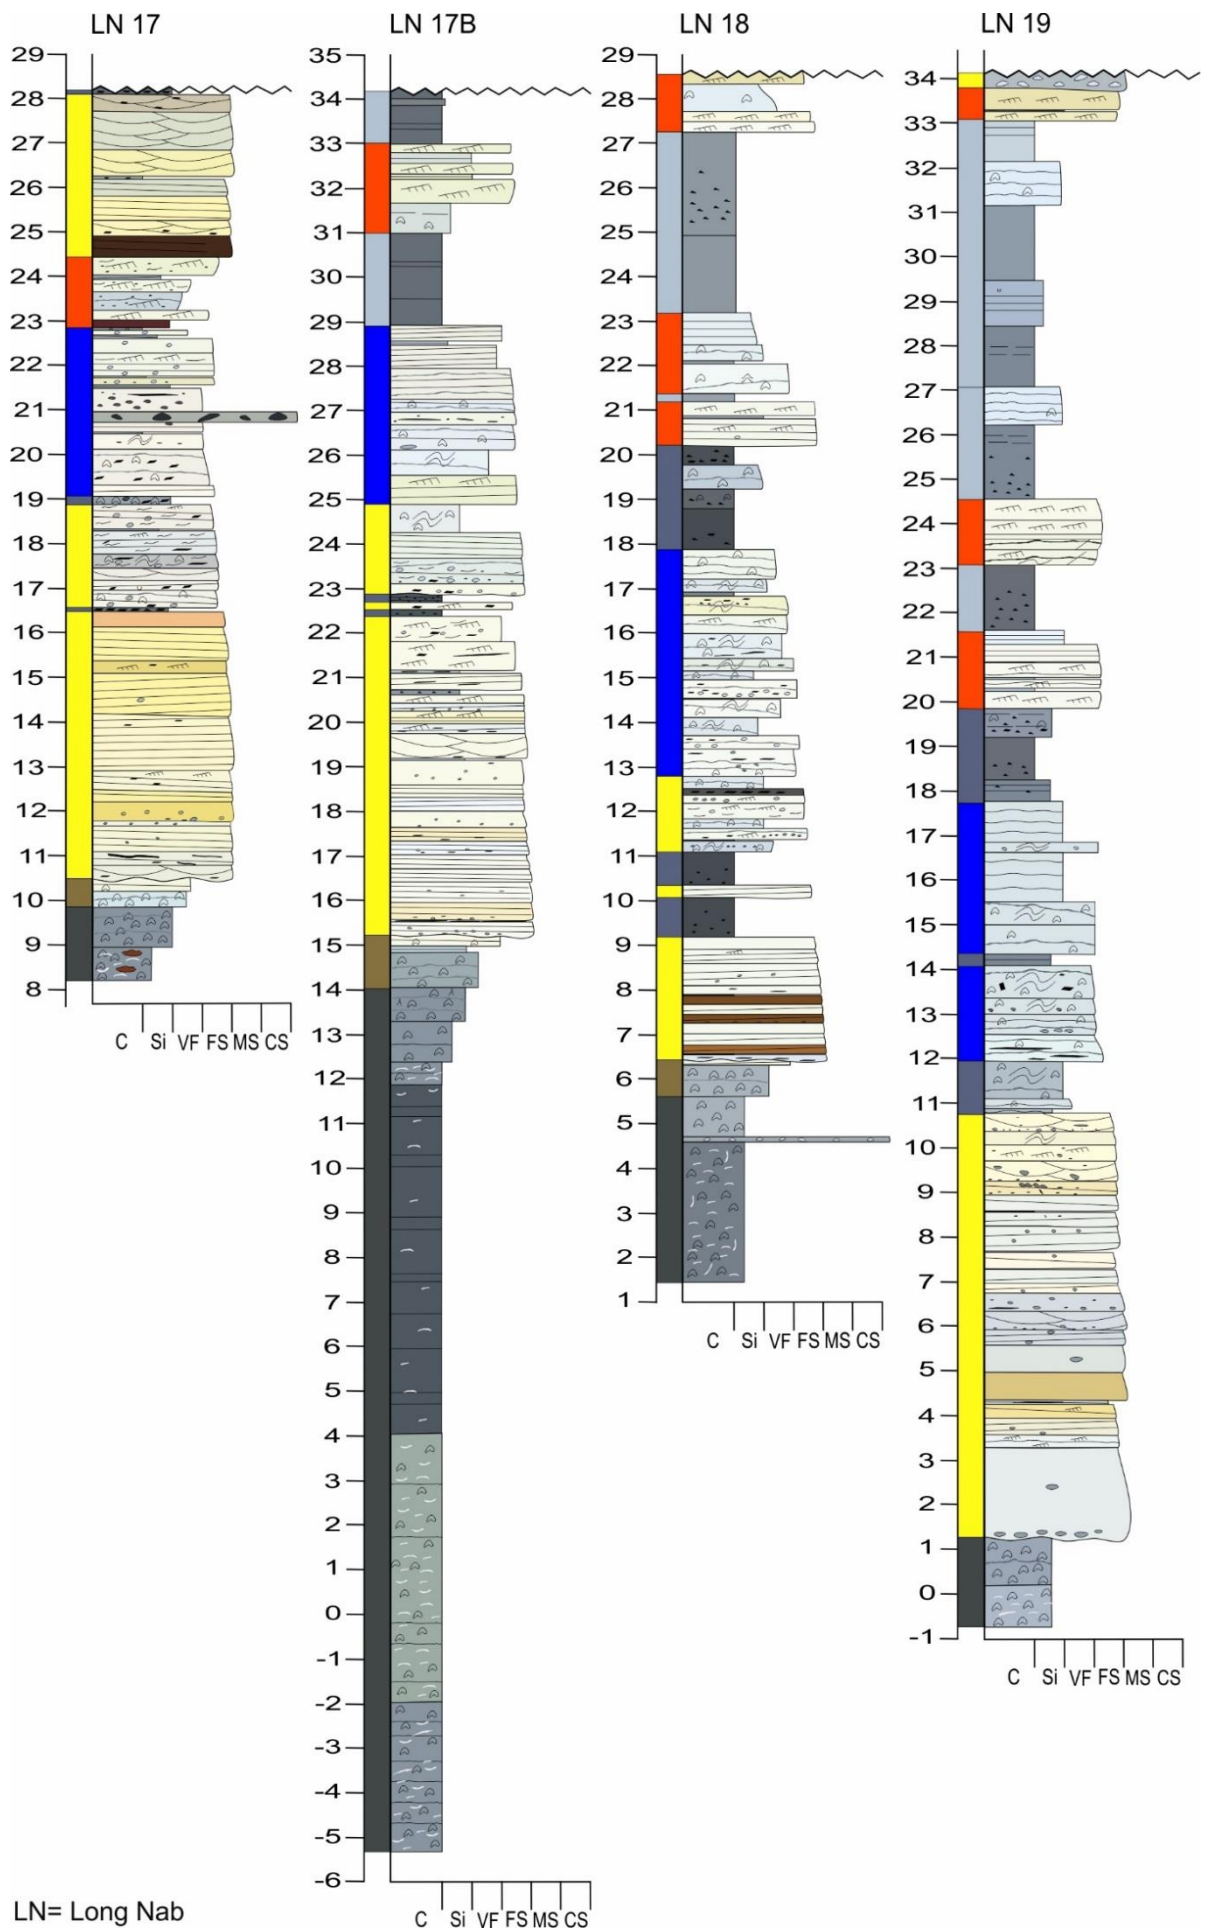

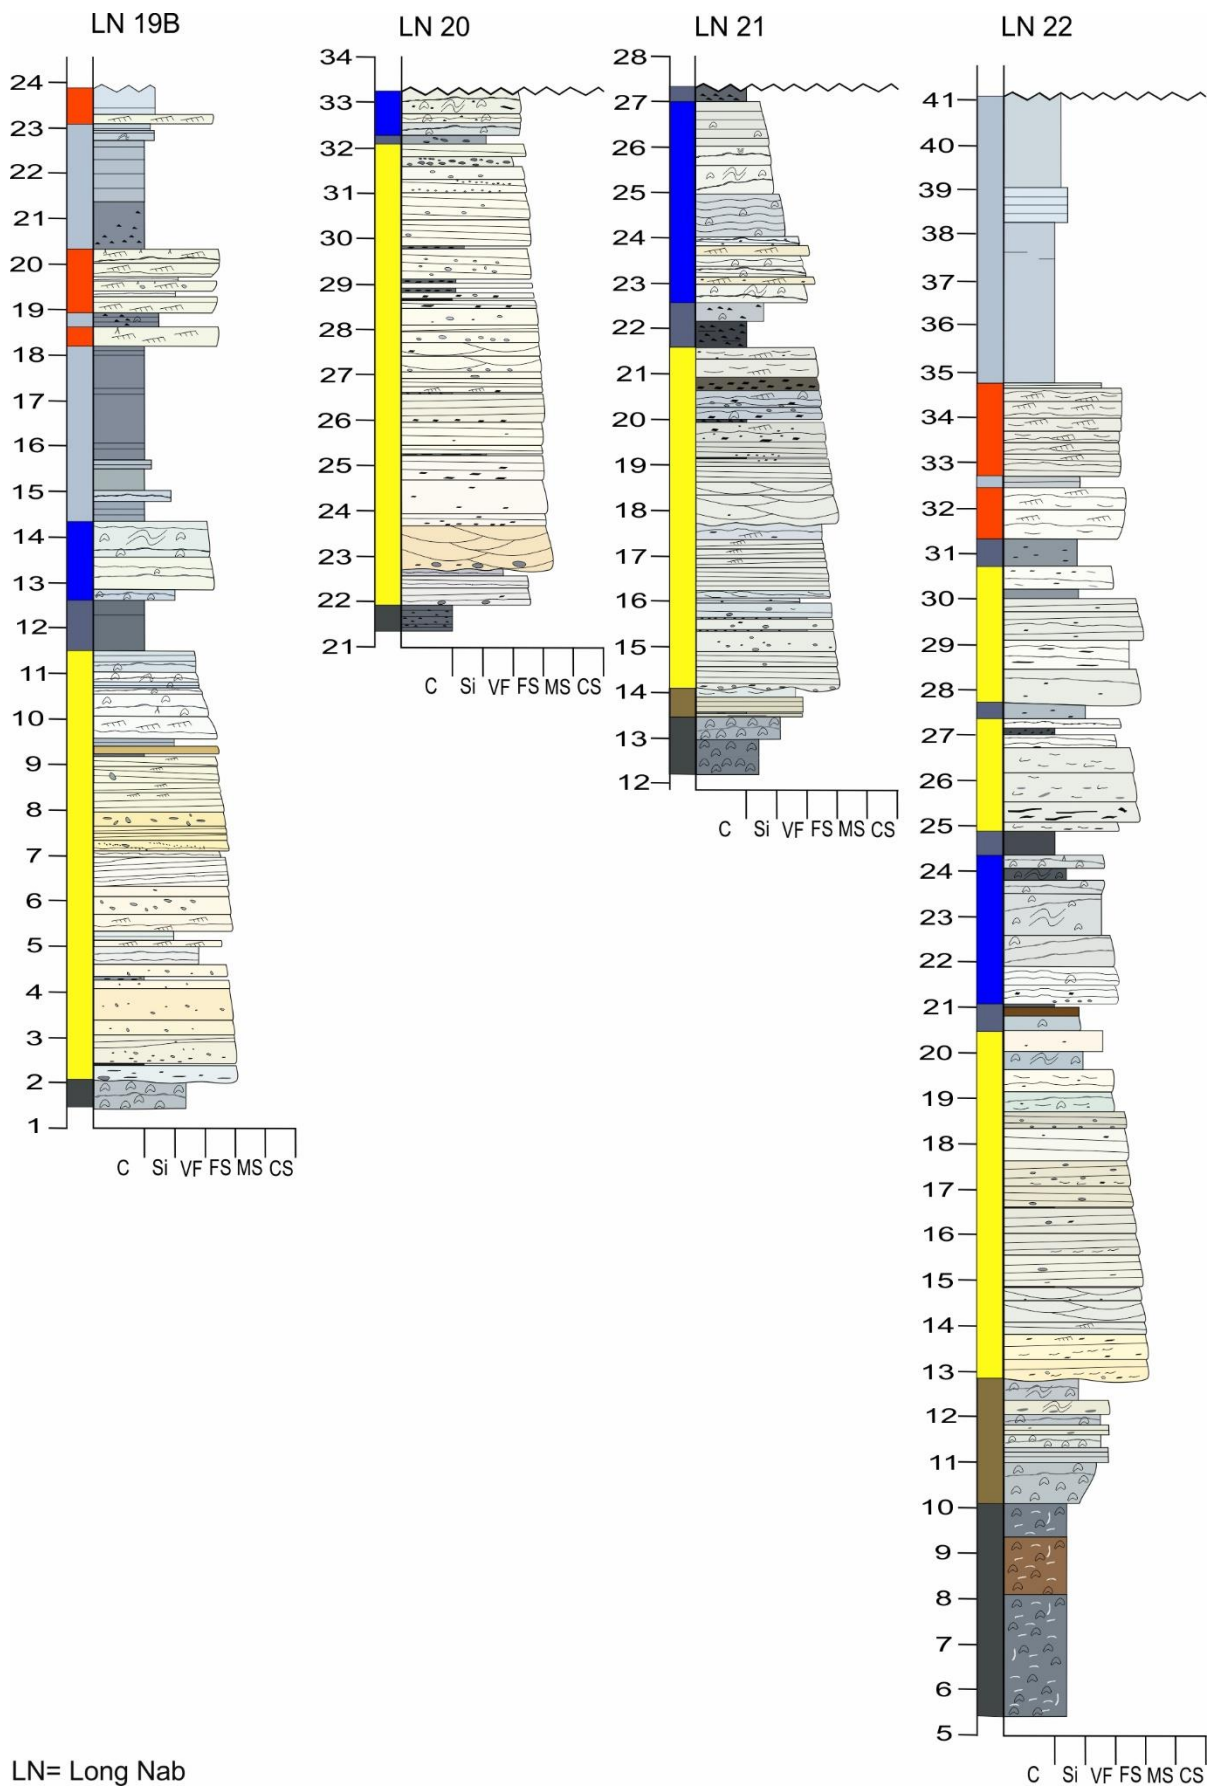



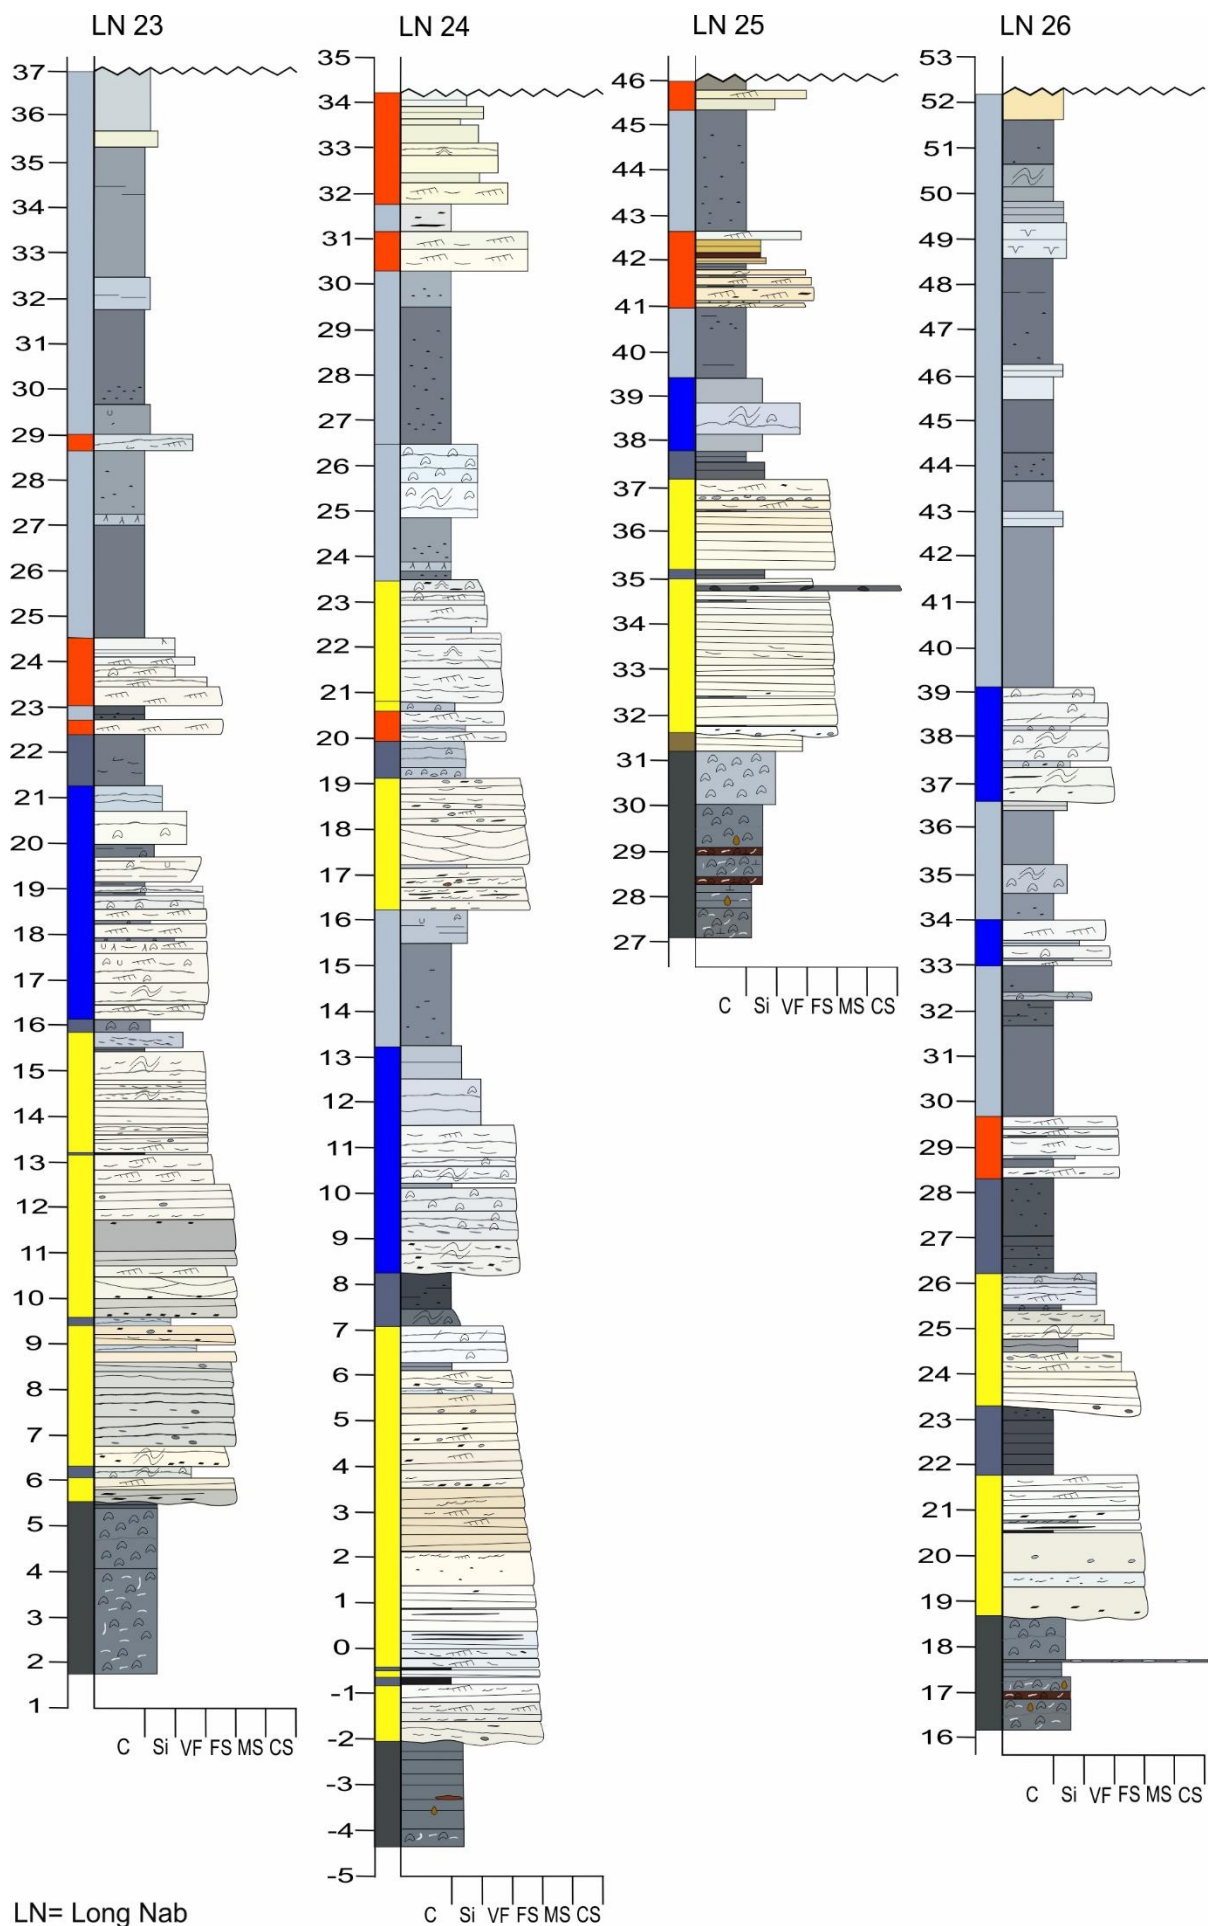



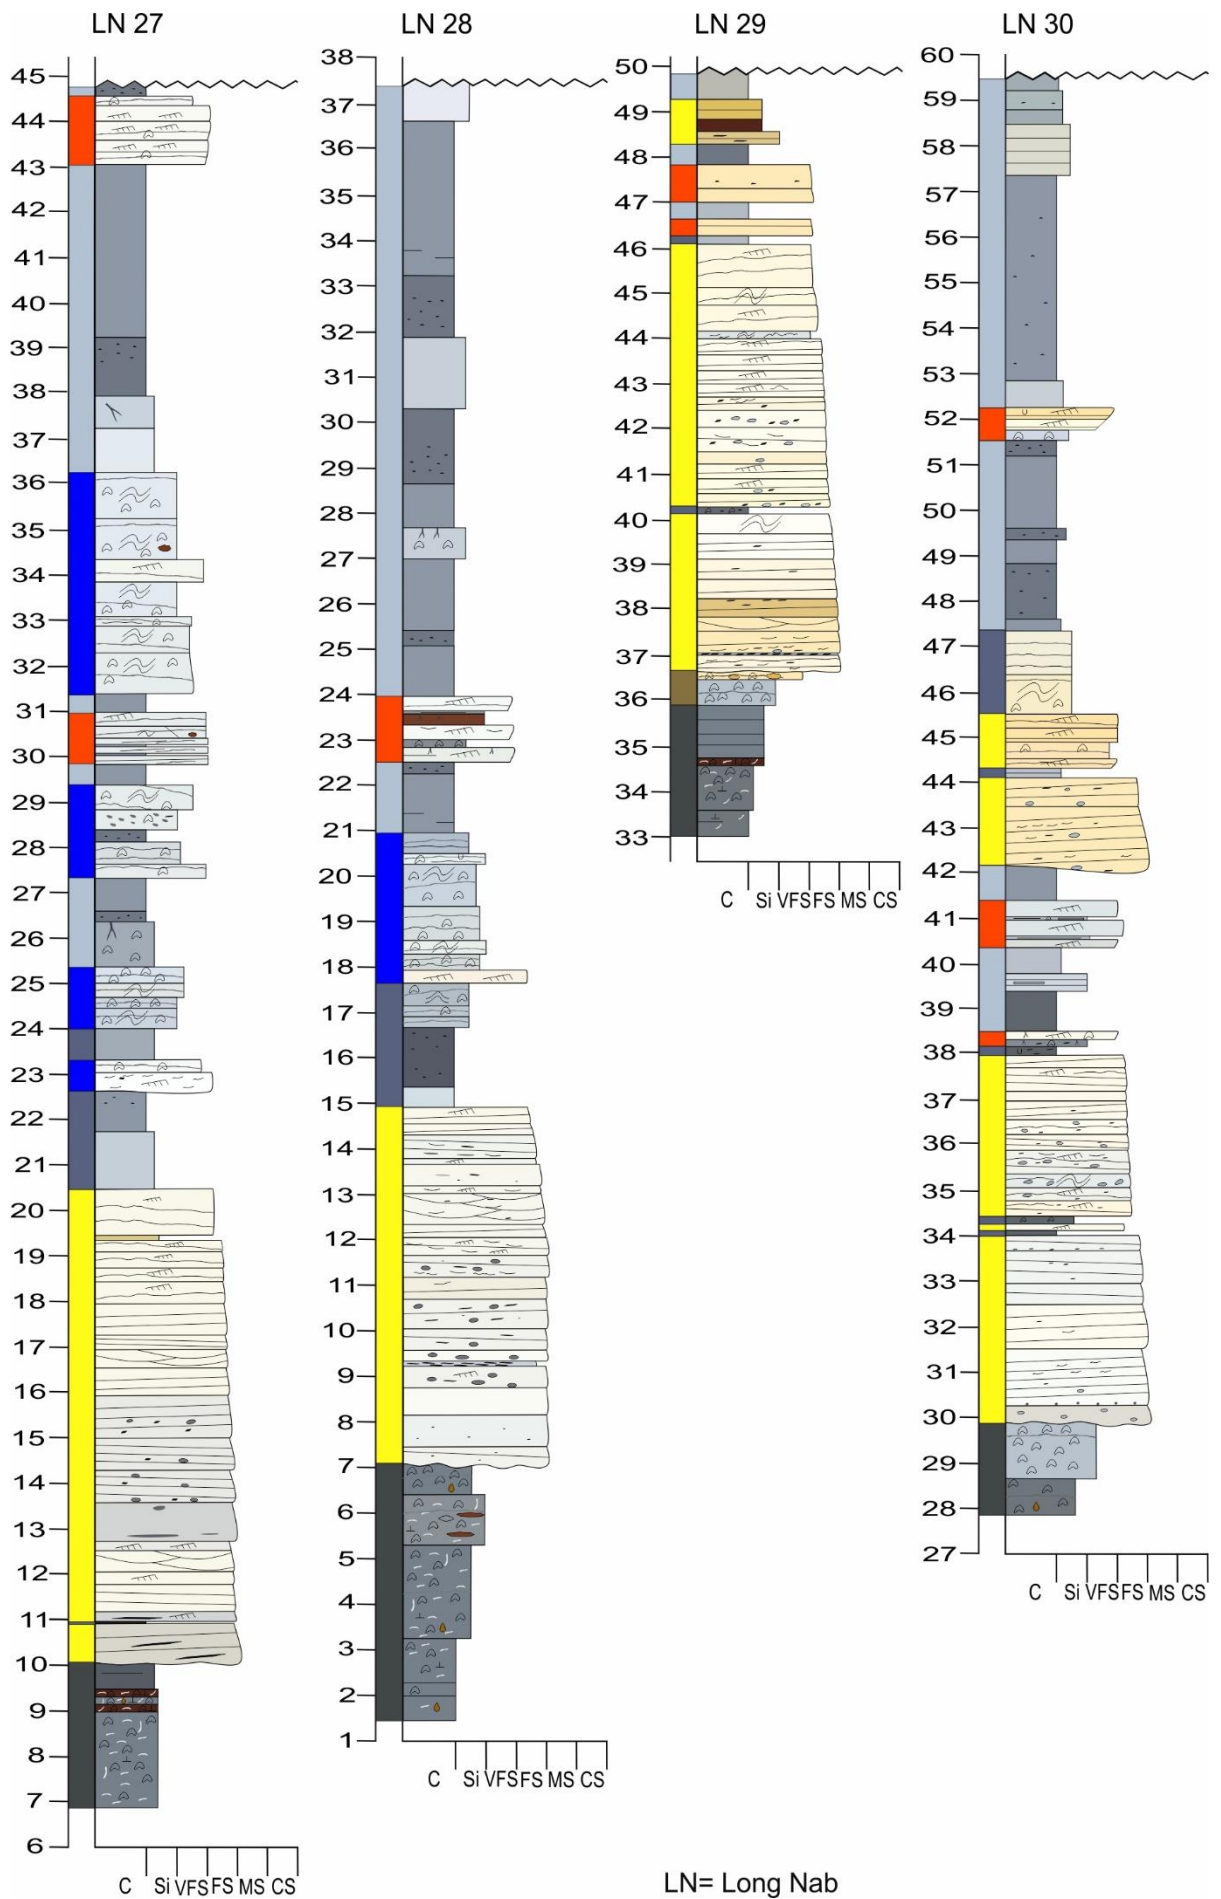

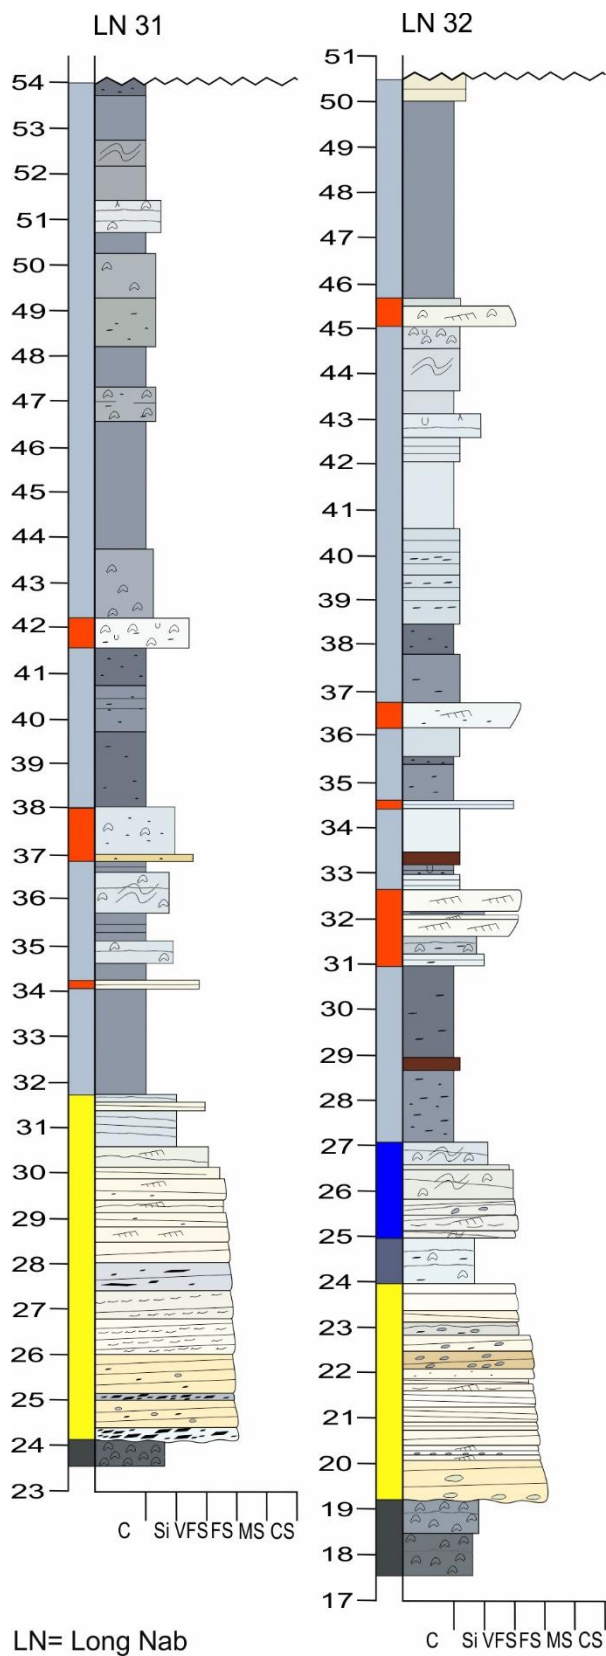

Borehole core based facies proportion of the Scalby Formation at Long Nab

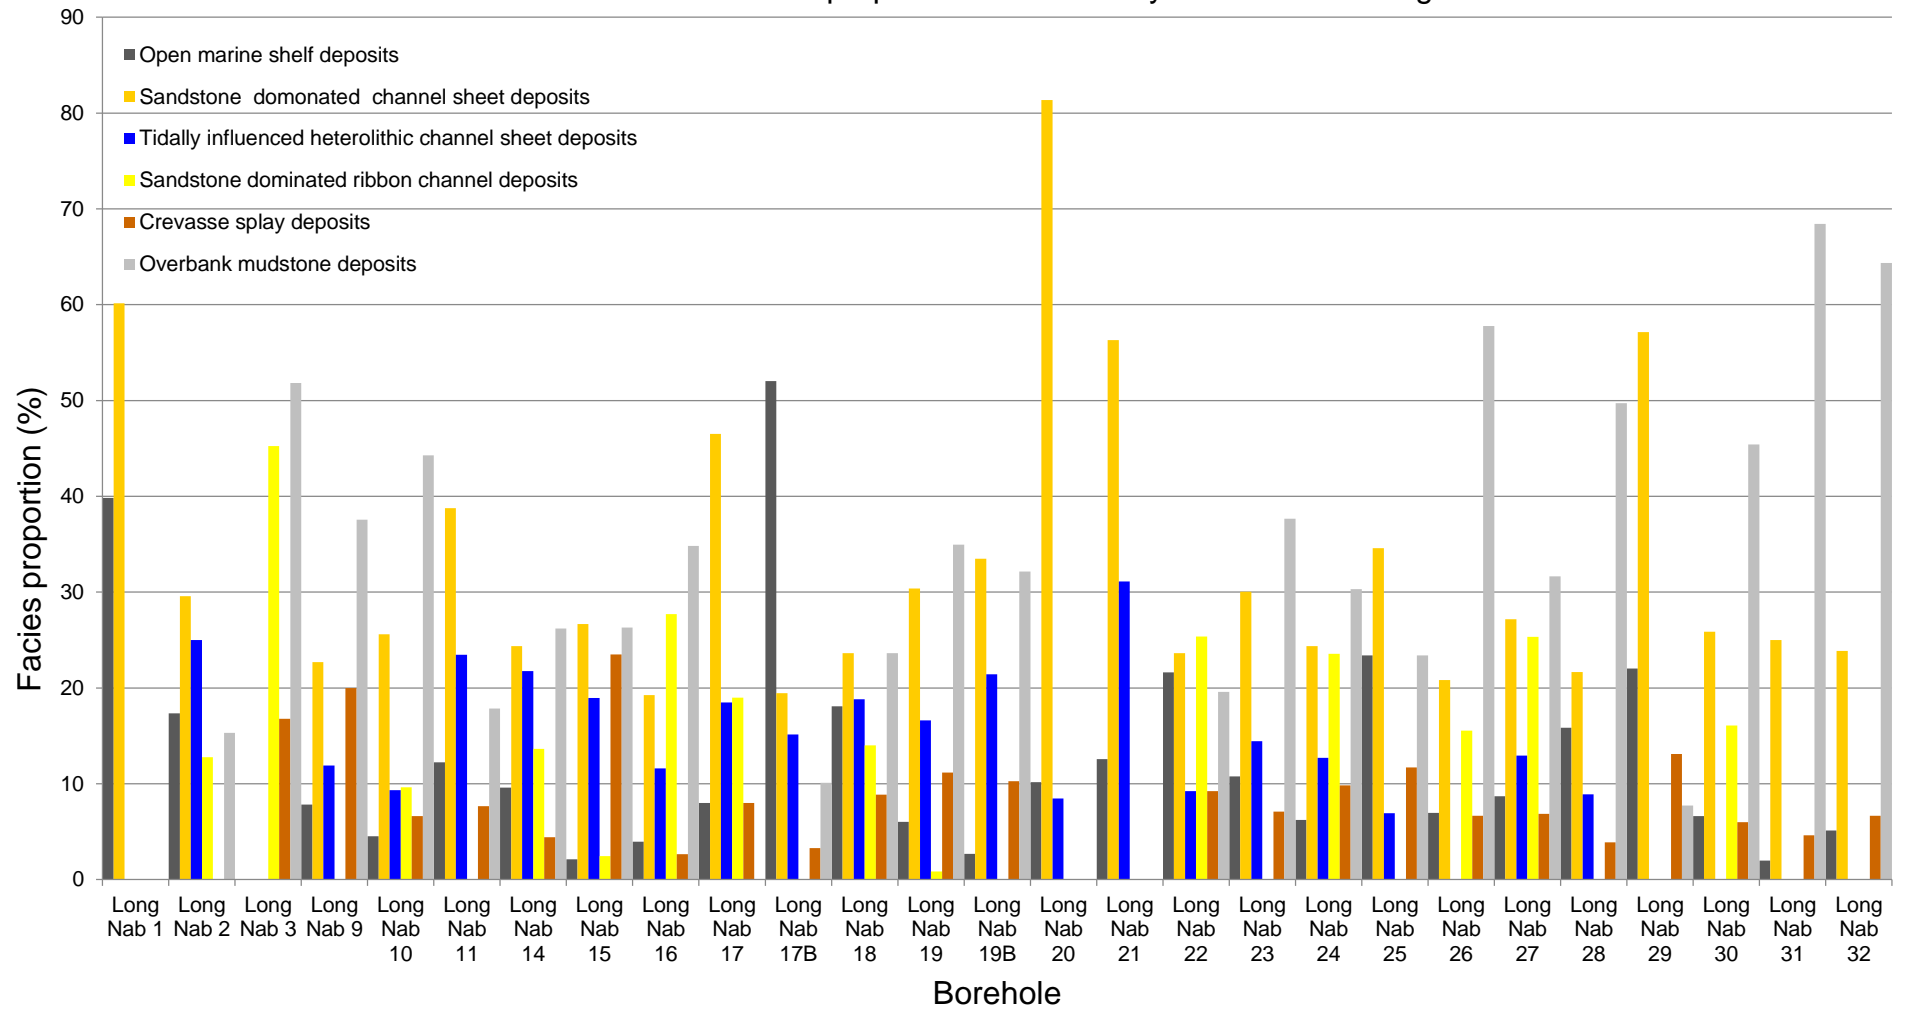

## **Appendix C**

Workflow to prepare Virtual Outcrop and the method used to estimate  
the true width of sandbody



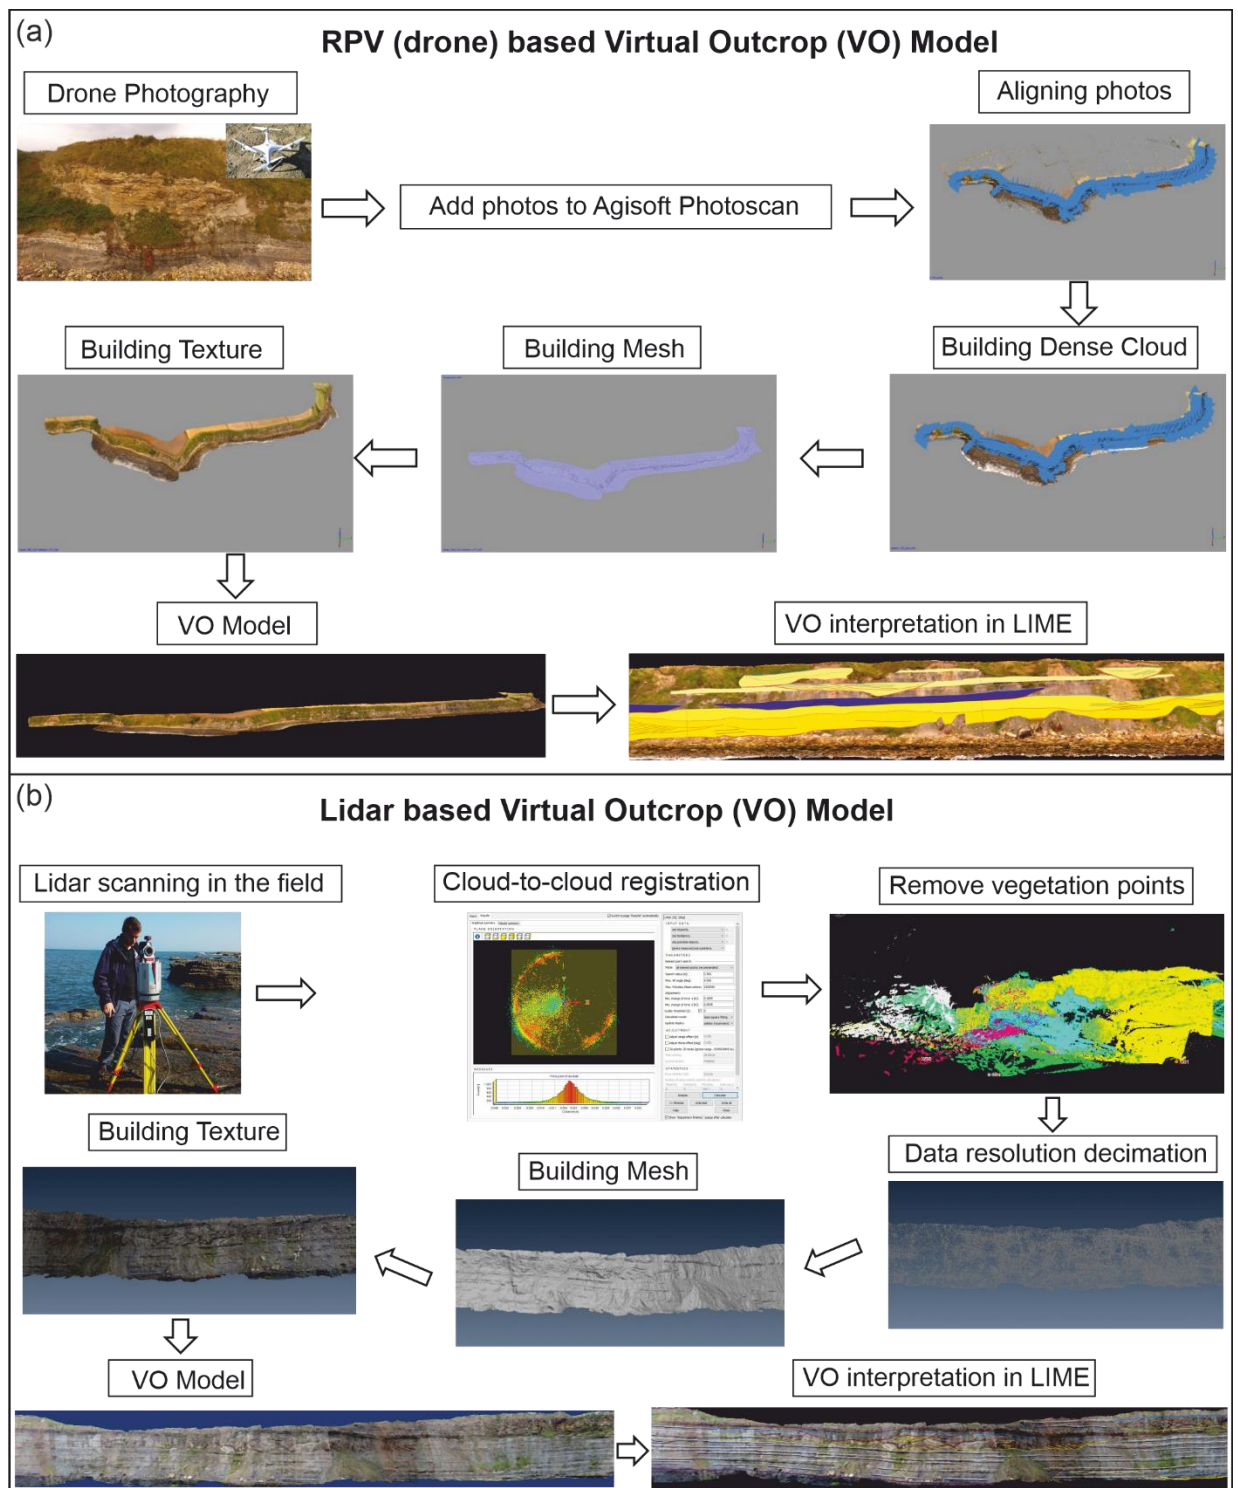

Summary of the workflow to prepare Virtual Outcrop (VO) from **(a)** drone photogrammetry and **(b)** lidar scanning (modified after Buckley *et al.* 2008, p. 635, fig. 7).

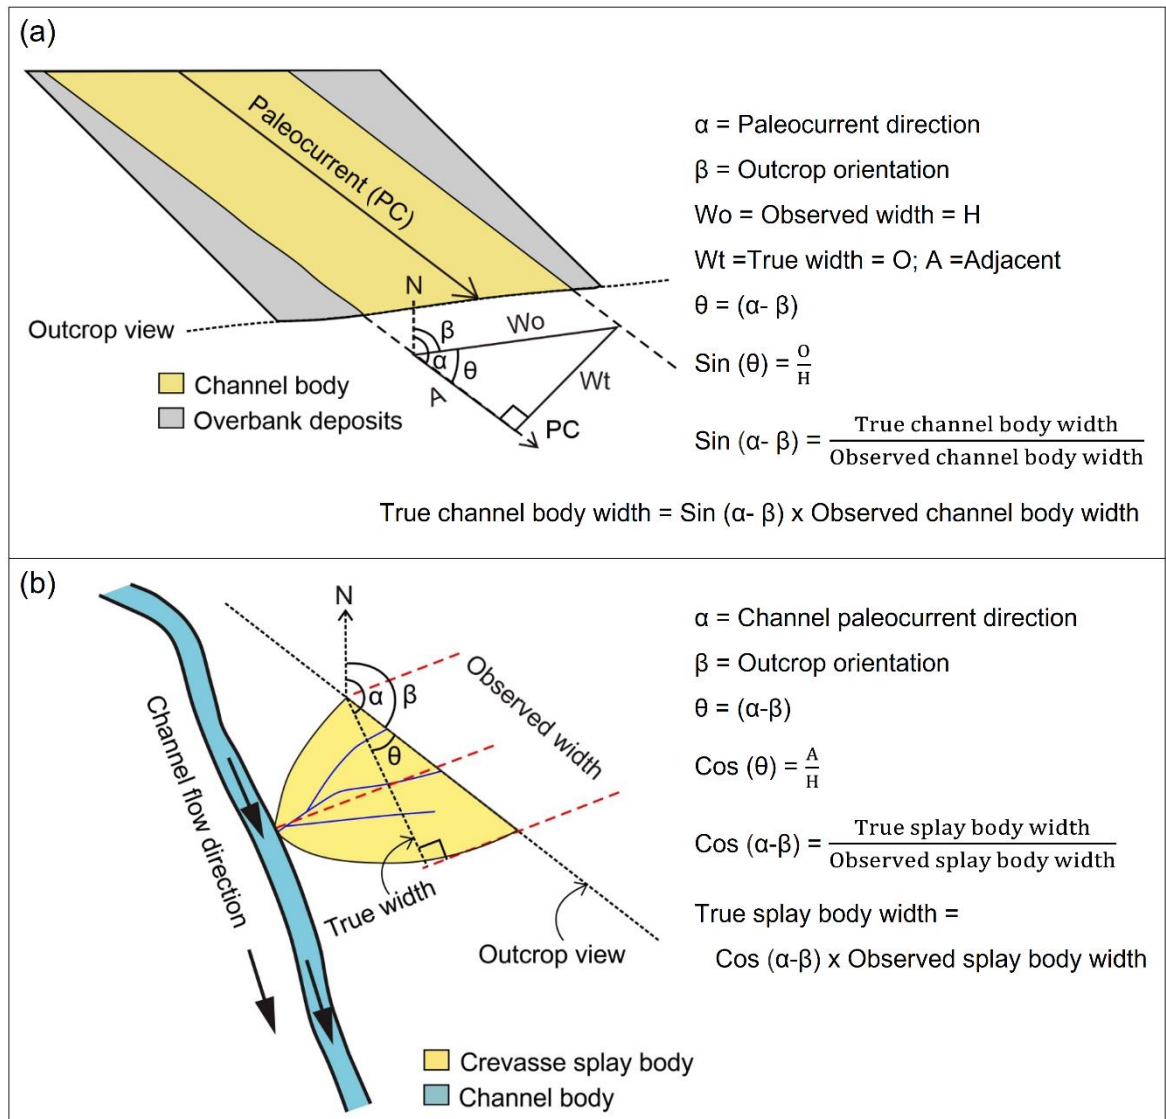

Planform diagram showing the interaction between outcrop and sandbodies and the method used to estimate the true width of the sandbody (modified after Fabuel-Perez et al. 2009). (a) Transformation of measured channel width to true width. (b) Transformations of measured crevasse splay width to true width from channel flow direction and outcrop orientation. Splay formation direction measured from the average splay formation angle and paleochannel flow direction.

## **Appendix D**

Correlation panel of crevasse splay bodies





## **Appendix E**

Interpreted virtual outcrops

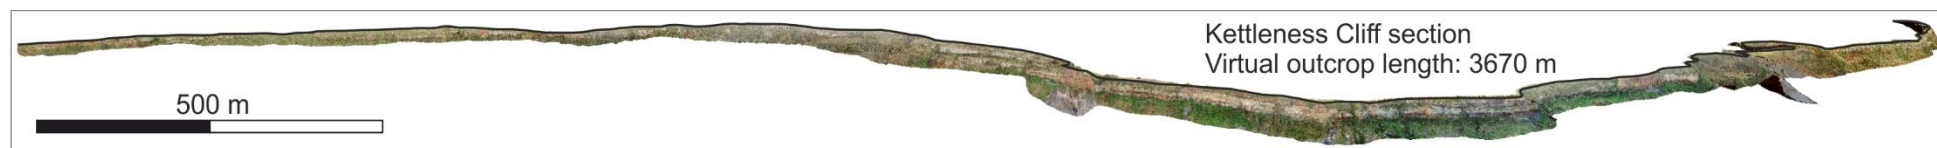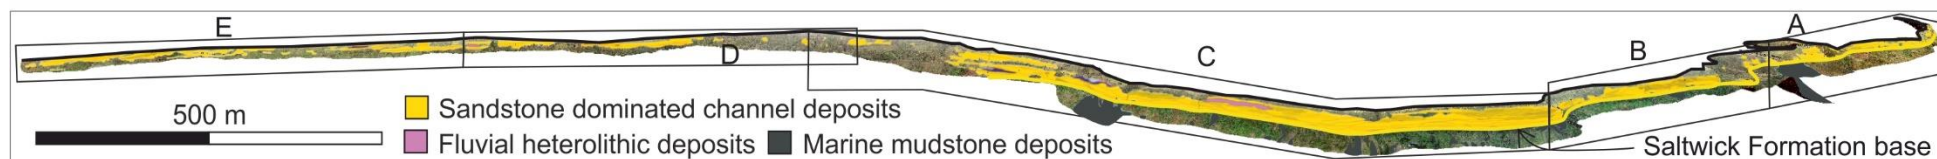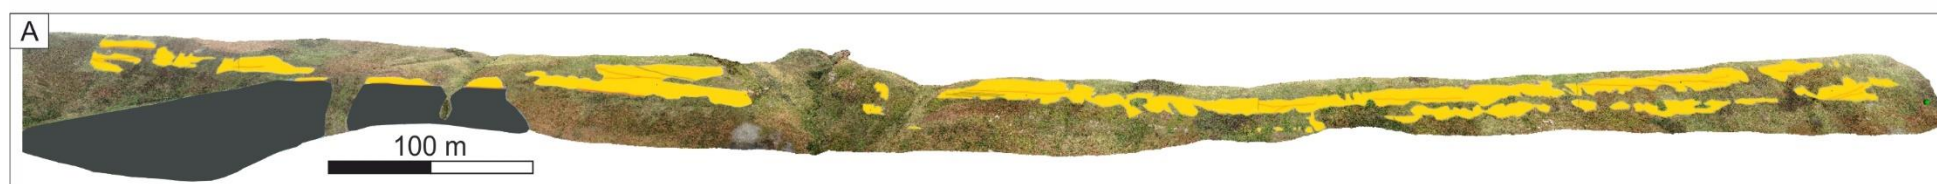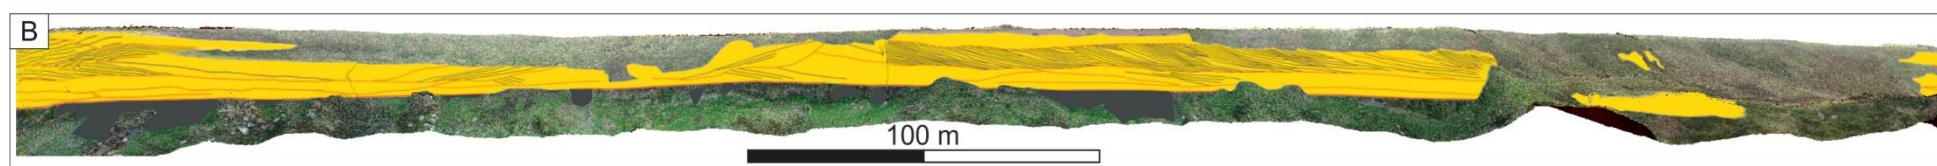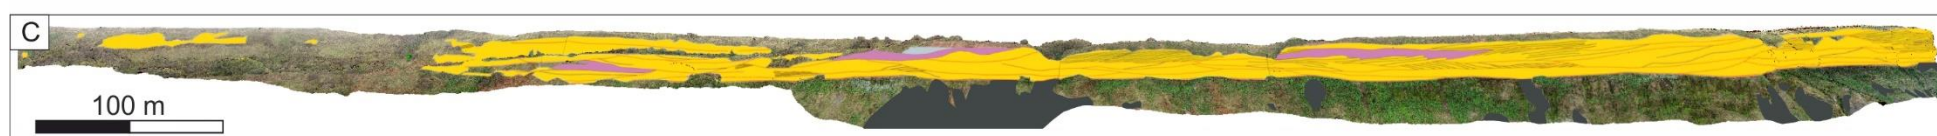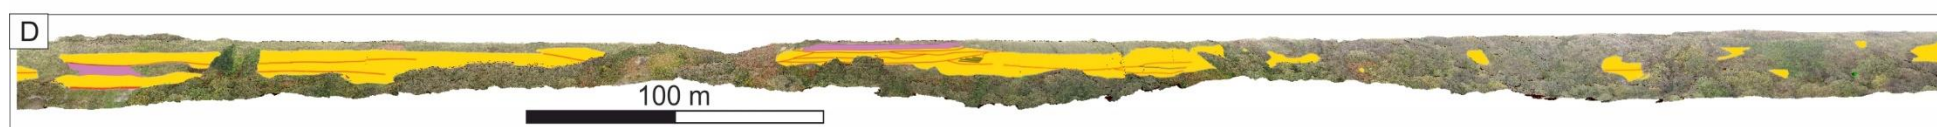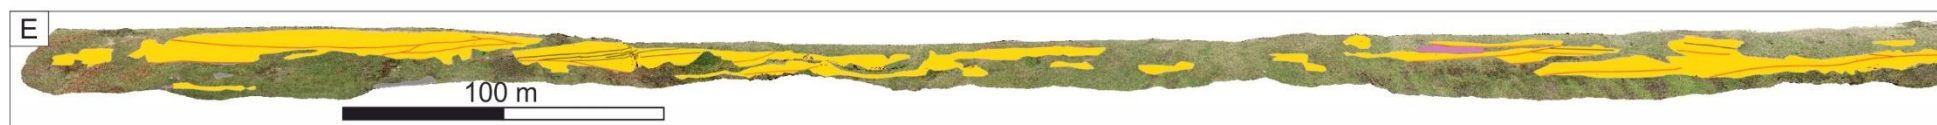

Whitby West Cliff Section, Virtual Outcrop length: 160 m

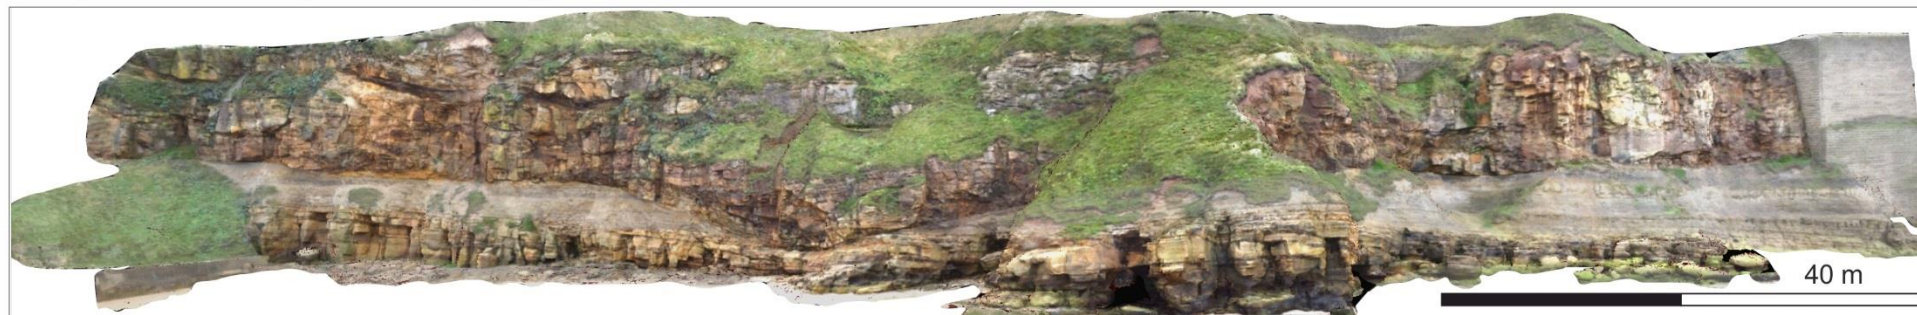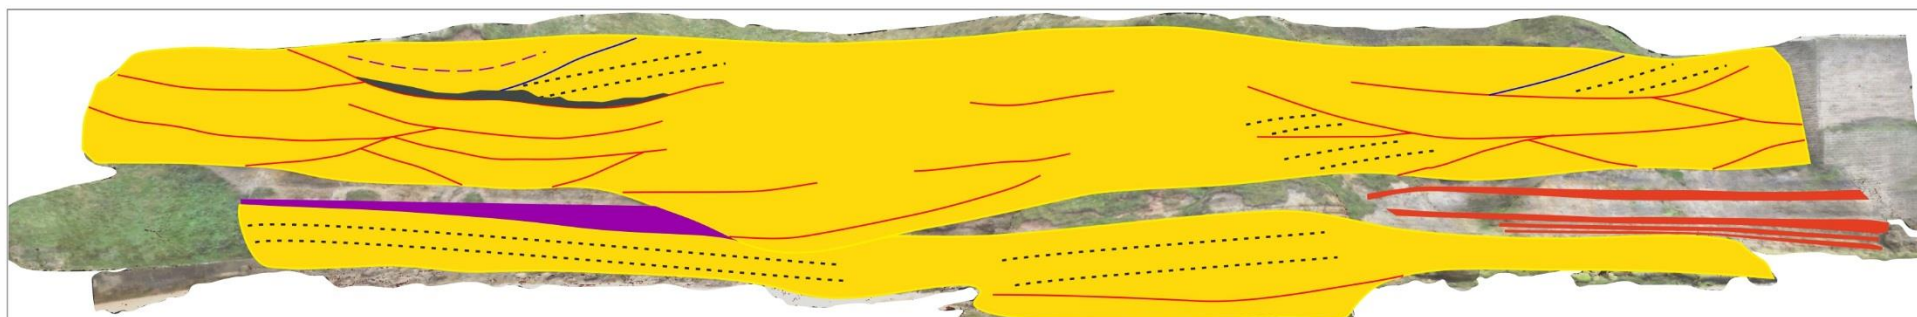

Key:  Sandstone dominated channel deposits  Crevasse splay sandstone deposits  Mudstone dominated heterolithic levee deposits  
 Mudstone dominated channel deposits  Bedform  Accretion surface  Barform  Storey  Channel body



Whitby East Cliff Section, Virtual Outcrop length: 1580 m

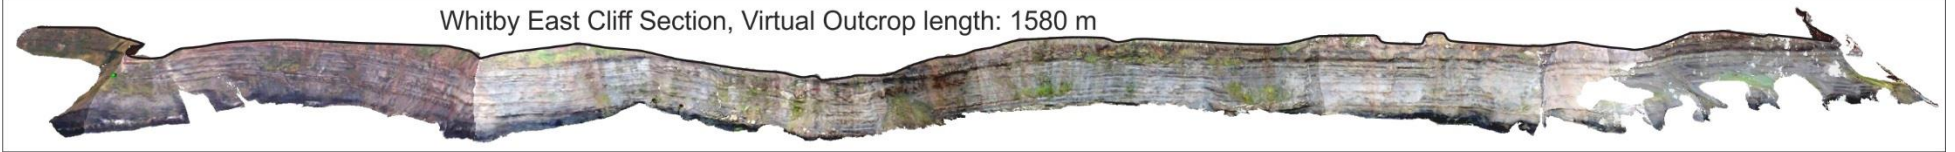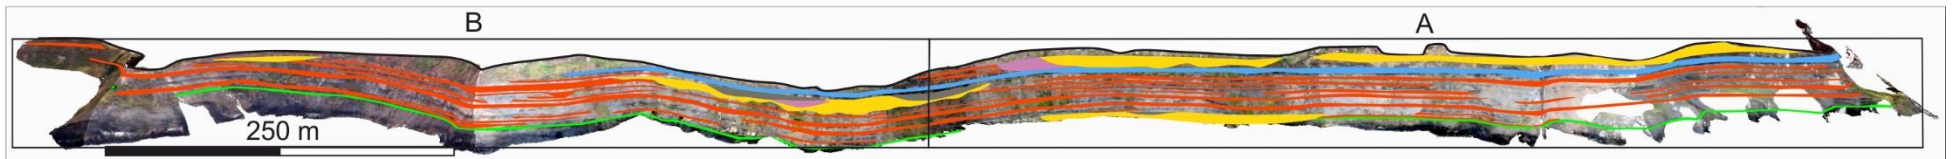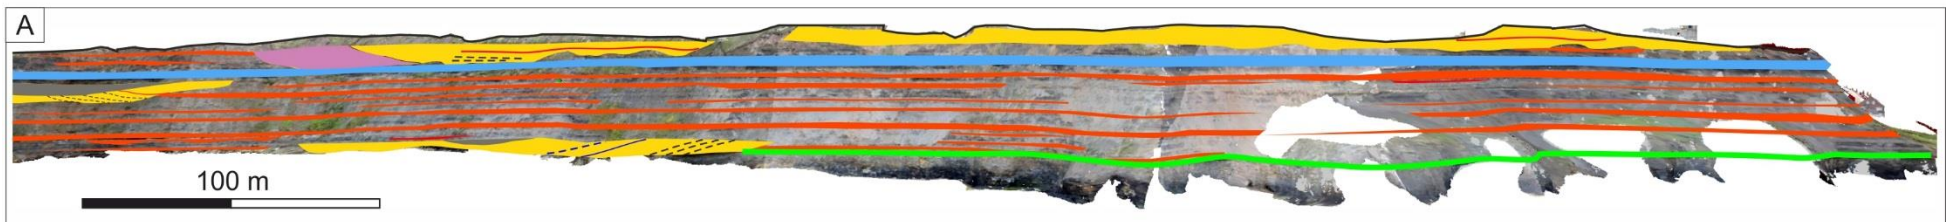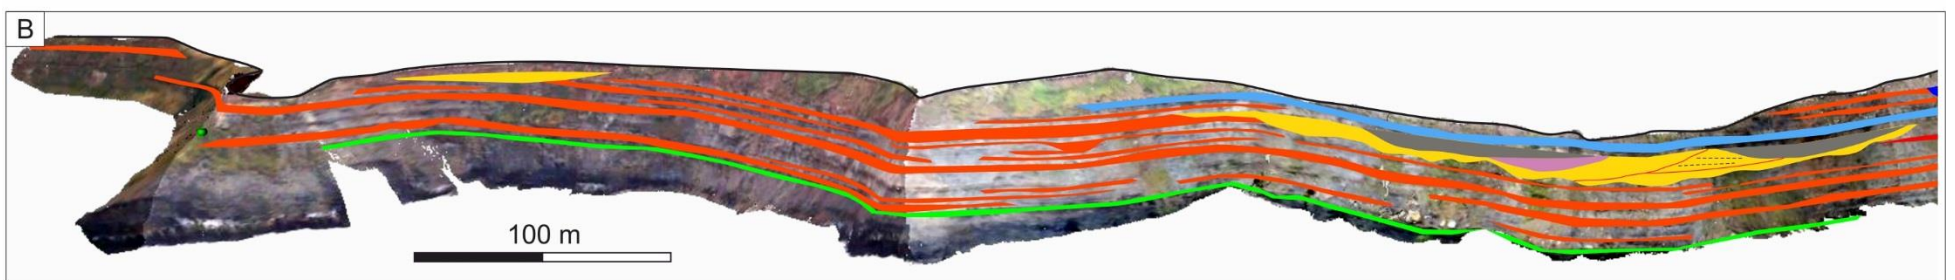

Key: Accretion surface    Bar boundary    Storey surface    Sandstone dominated channel deposits    Fluvial heterolithic deposits  
 Mudstone dominated channel deposits    Crevasse splay & crevasse channel deposits    Dogger Formation (marine sandstone deposits)  
 Eller Beck Formation (marine sandstone deposits)



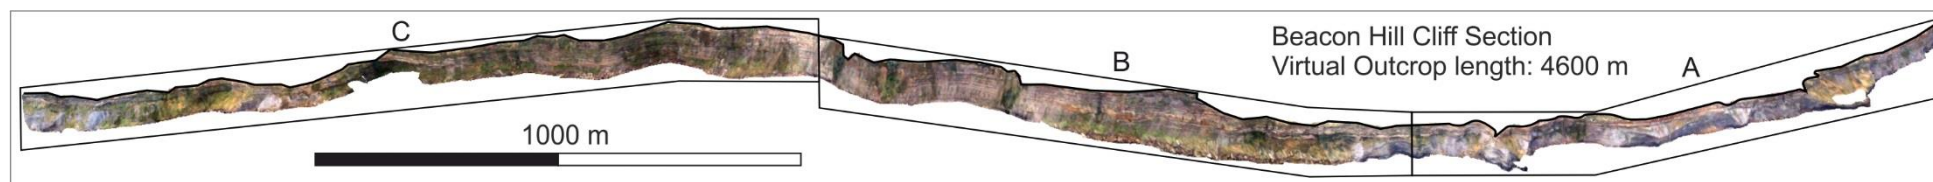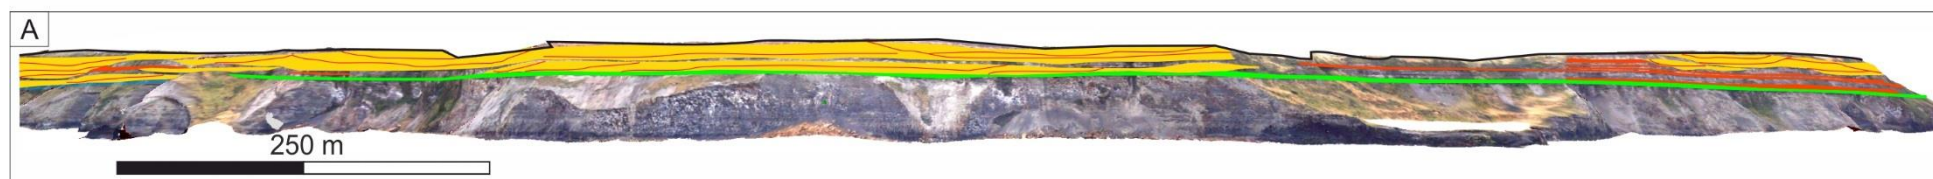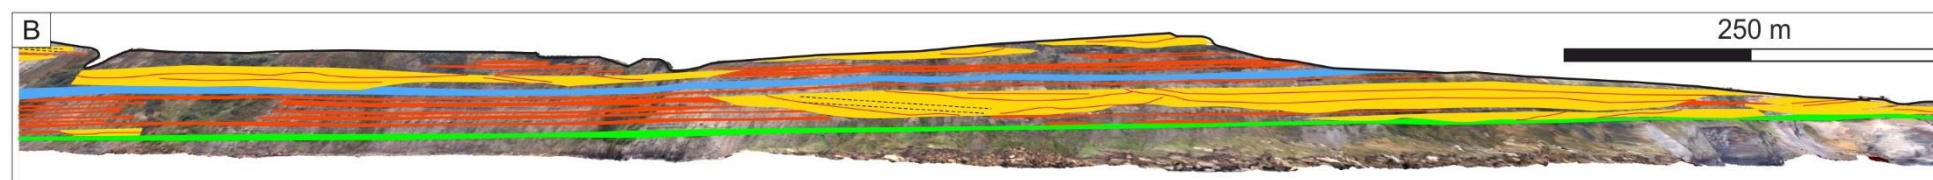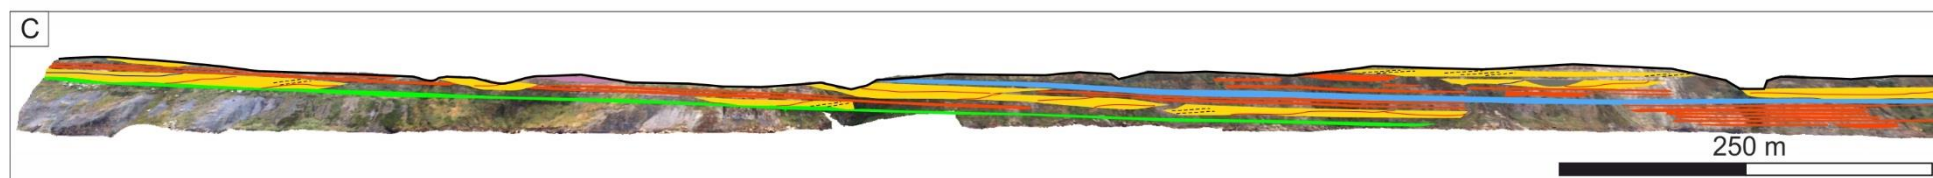

Key:    ↗ Accretion surface    ↘ Bar boundary    ↗ Storey surface    Sandstone dominated channel deposits    Fluvial heterolithic deposits  
 Mudstone dominated channel deposits    Crevasse splay & crevasse channel deposits    Dogger Formation (marine sandstone deposits)  
 Eller Beck Formation (marine sandstone deposits)

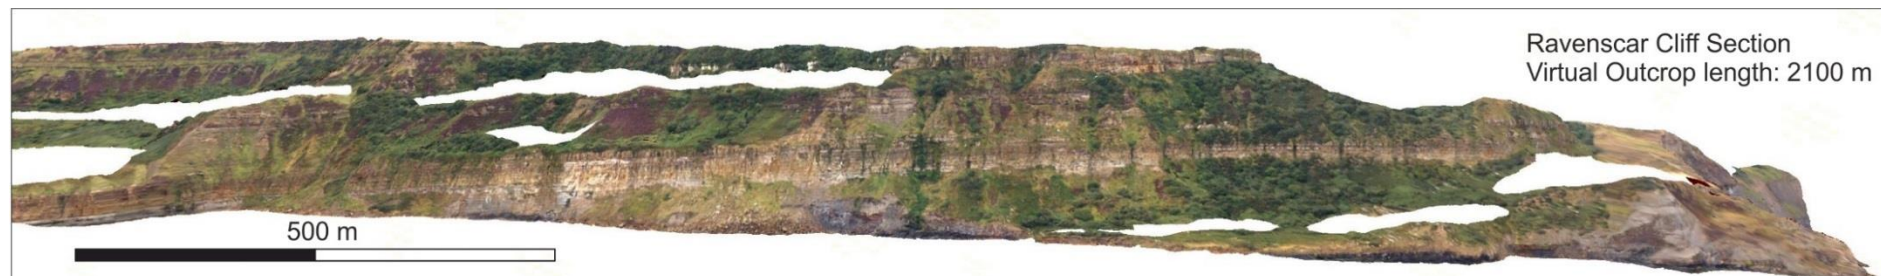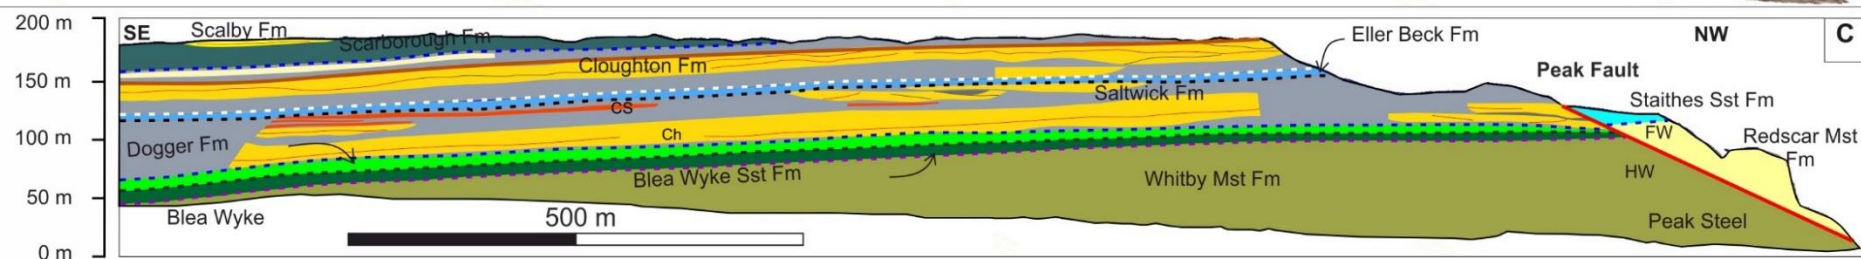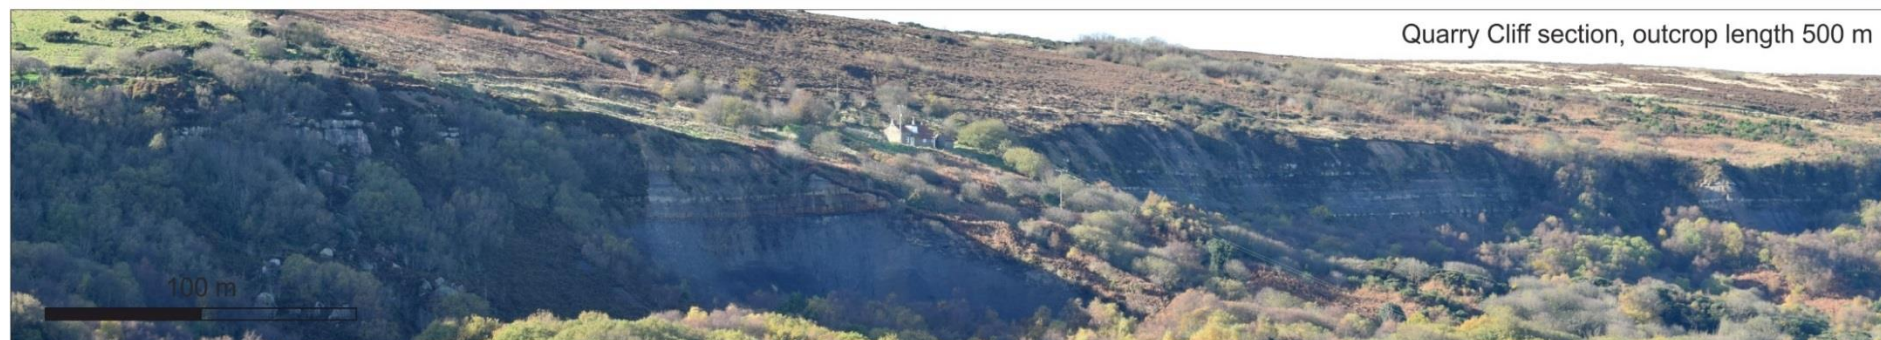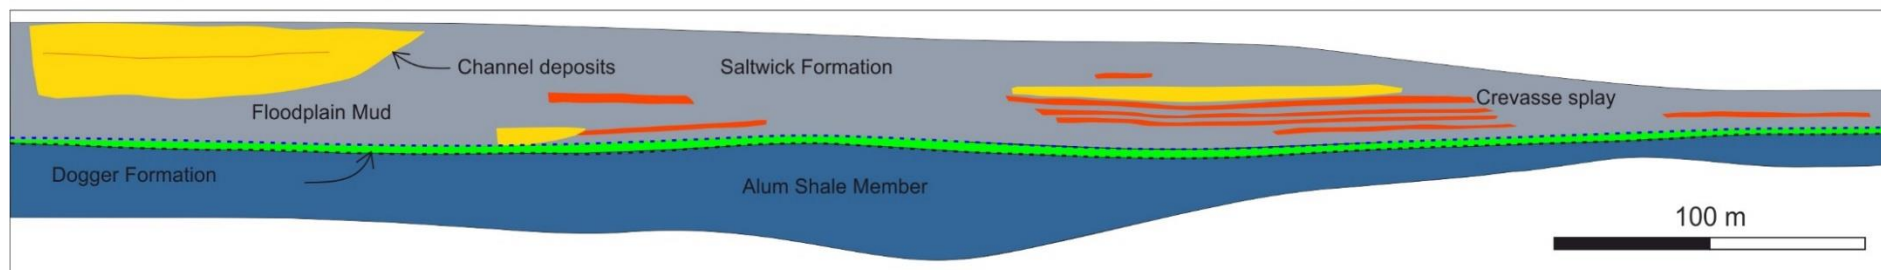



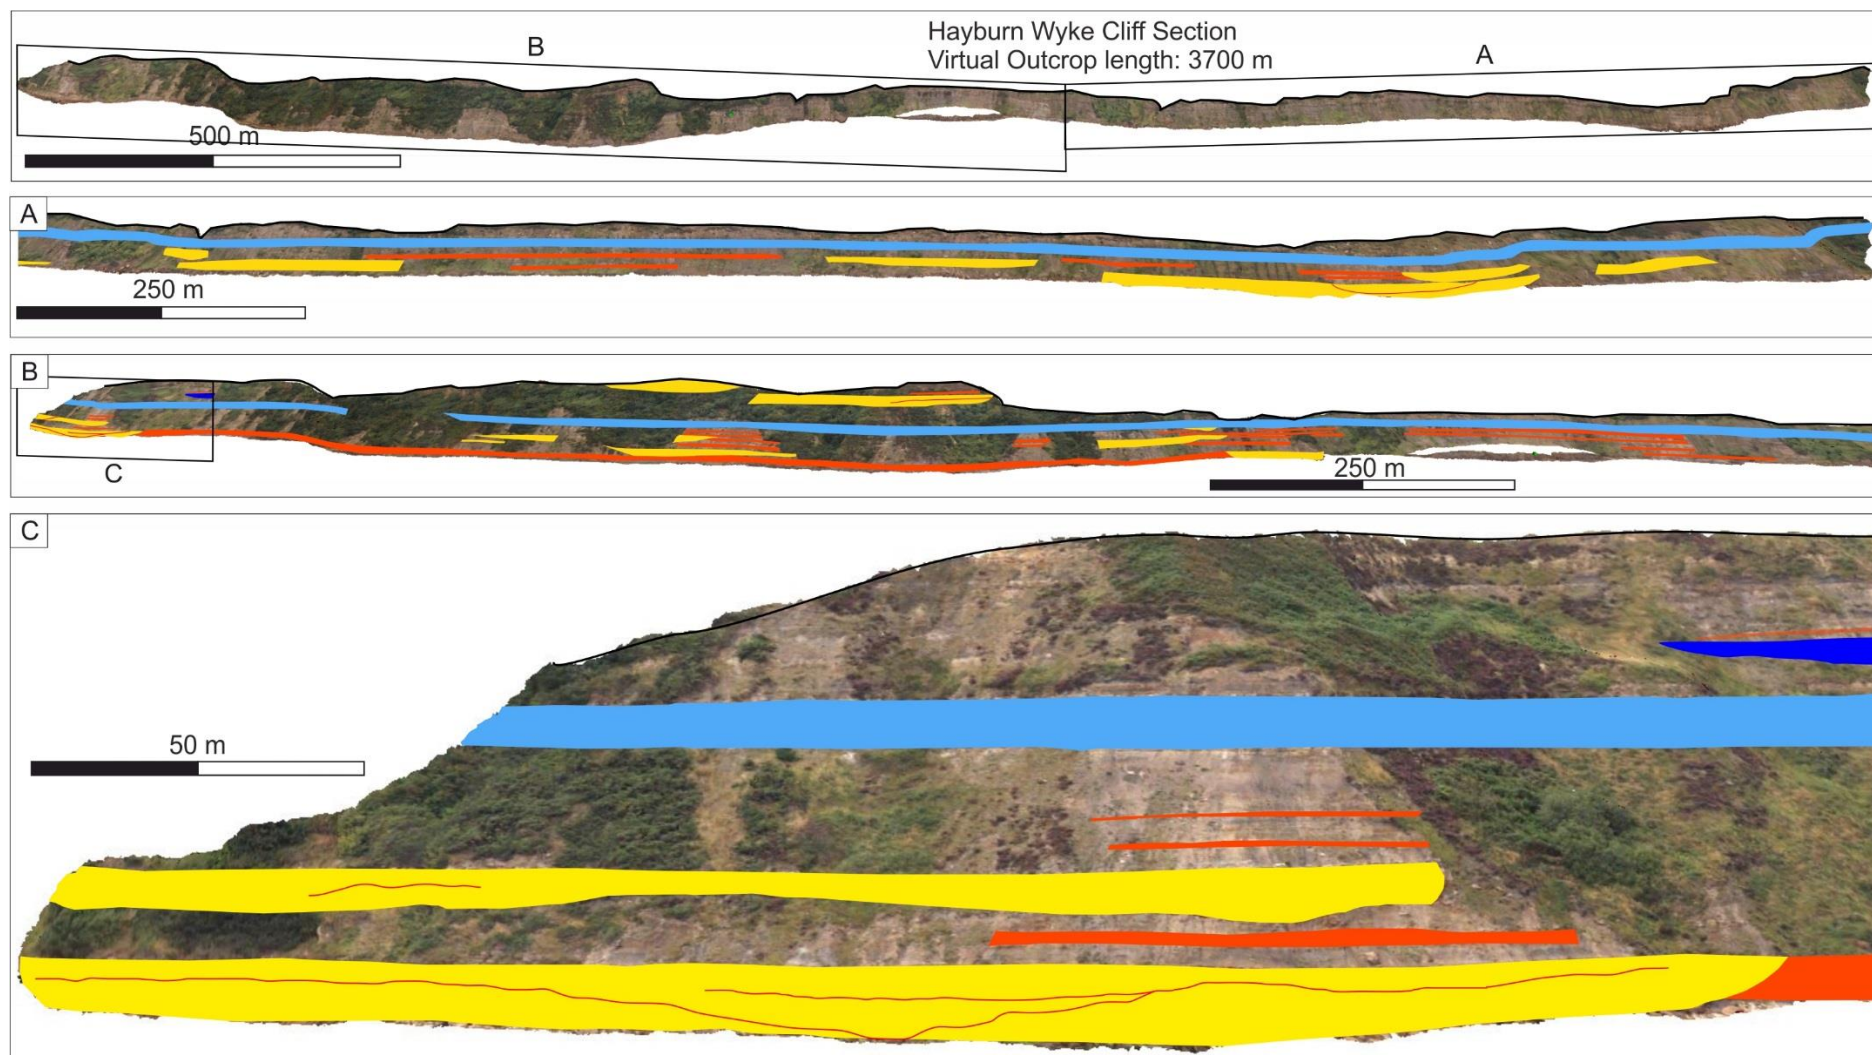

Key:

|                                                  |                                            |                                              |                                      |                                              |
|--------------------------------------------------|--------------------------------------------|----------------------------------------------|--------------------------------------|----------------------------------------------|
| • Accretion surface                              | Bar boundary                               | Storey surface                               | Sandstone dominated channel deposits | Tidally influenced heterolithic deposits (?) |
| Mudstone dominated channel deposits              | Crevasse splay & crevasse channel deposits | Dogger Formation (marine sandstone deposits) |                                      |                                              |
| Eller Beck Formation (marine sandstone deposits) |                                            |                                              |                                      |                                              |

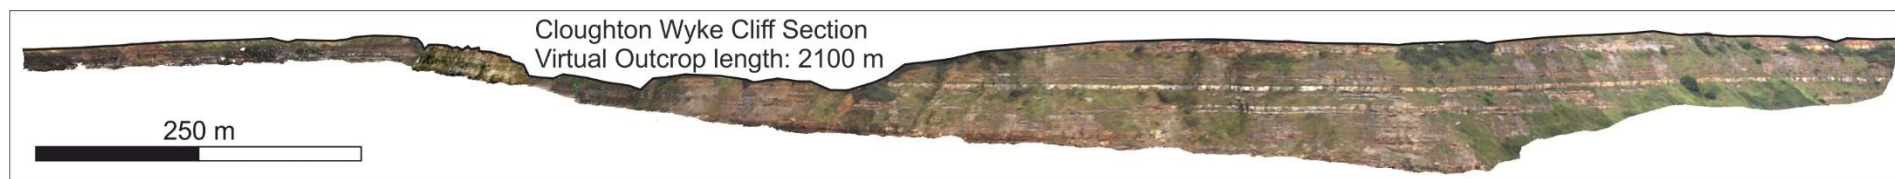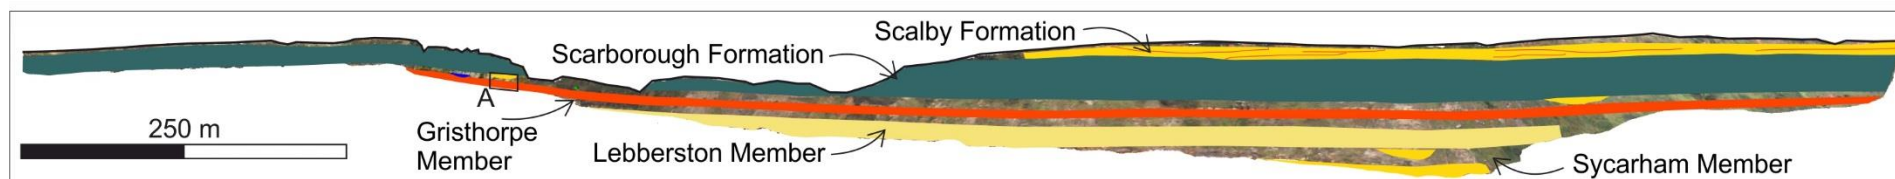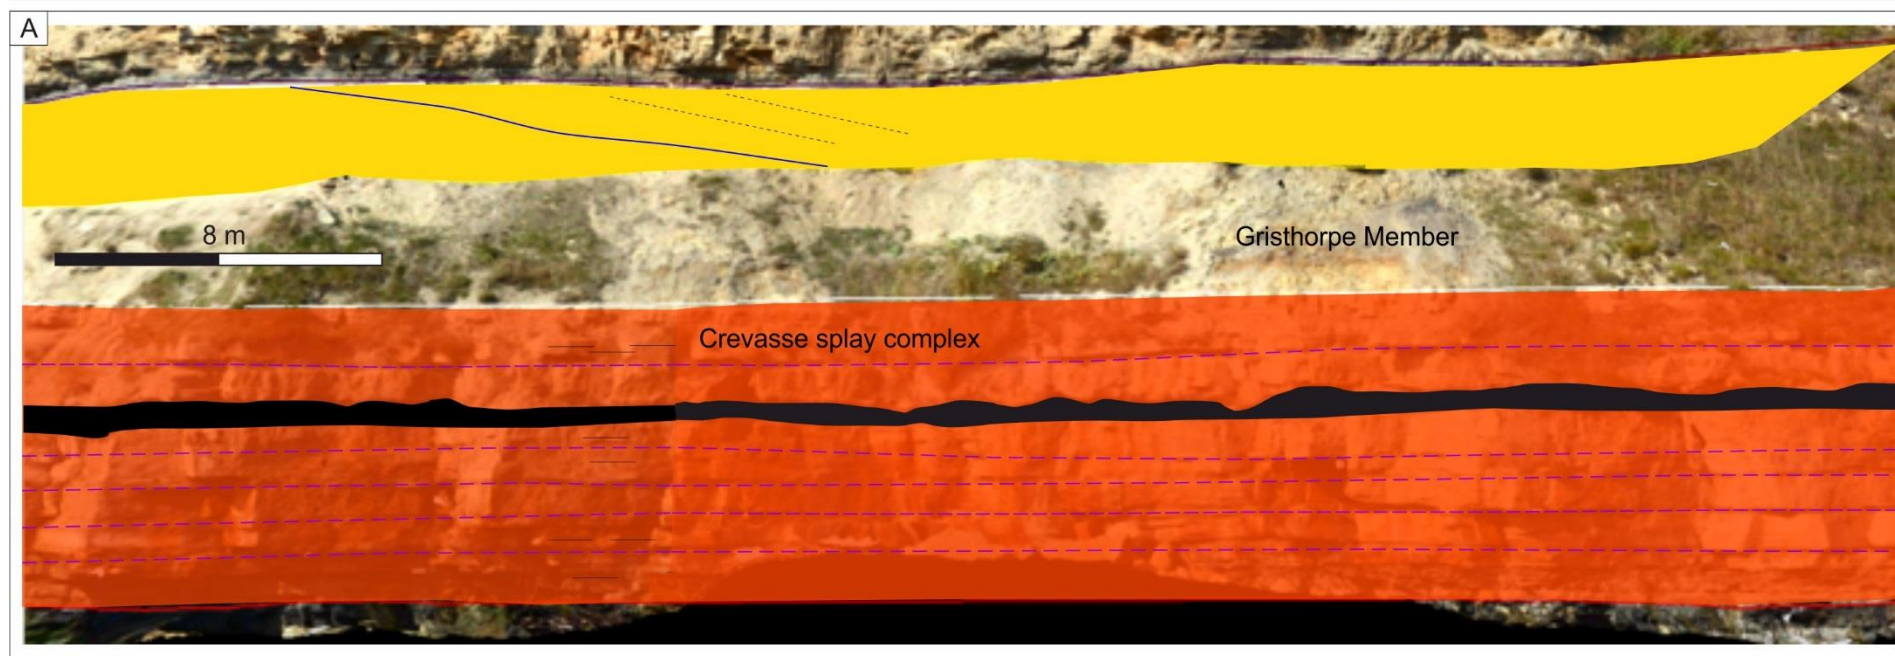

Key:

|                                               |                                            |              |                |                                                              |      |
|-----------------------------------------------|--------------------------------------------|--------------|----------------|--------------------------------------------------------------|------|
| Bedform                                       | Accretion surface                          | Bar boundary | Storey surface | Sandstone dominated channel deposits                         | Coal |
| Tidally influenced heterolithic deposits      | Crevasse splay & crevasse channel deposits |              |                | Scarborough Formation (marine sandstone & mudstone deposits) |      |
| Lebberston Member (marine sandstone deposits) |                                            |              |                |                                                              |      |



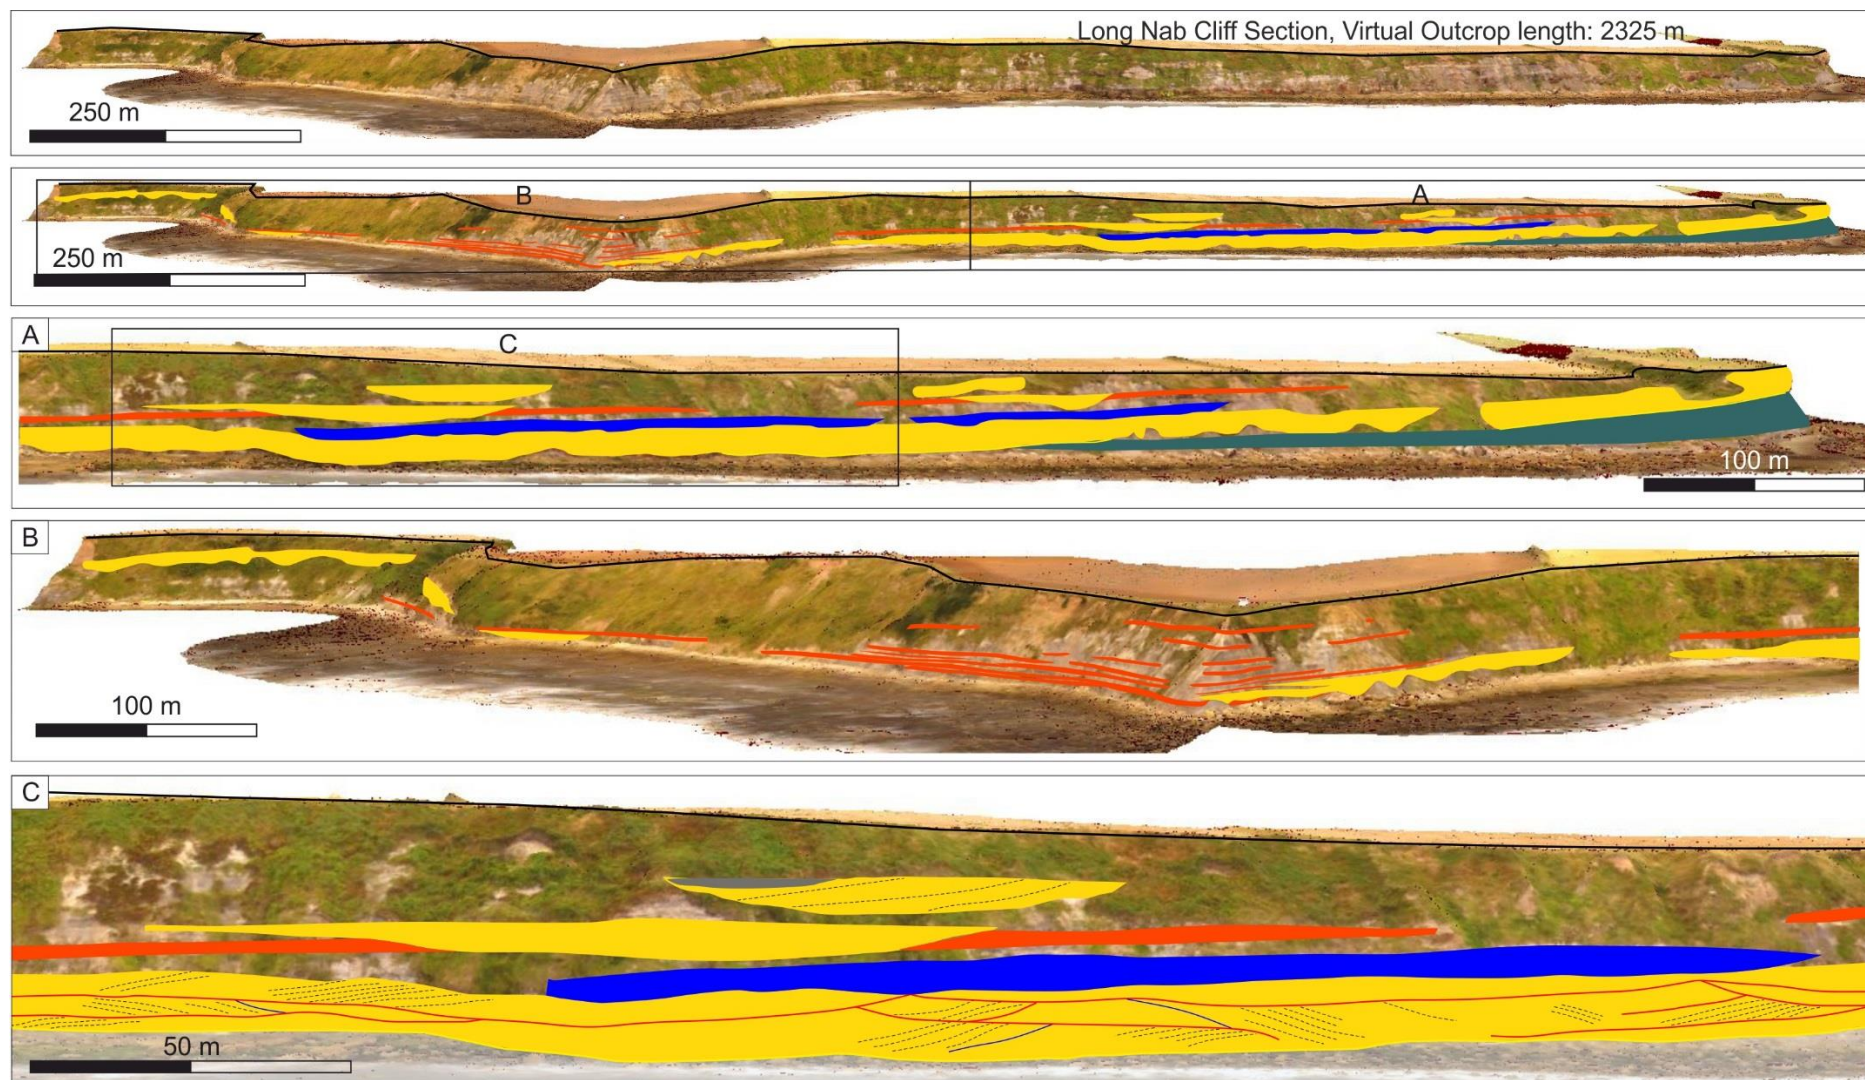

Key:   
 • Accretion surface    Bar boundary    Storey surface    Sandstone dominated channel deposits    Tidally influenced heterolithic deposits  
 Mudstone dominated channel deposits    Crevasse splay & crevasse channel deposits    Scarborough Formation (marine mudstone & sandstone deposits)



Long Nab Foreshore Section  
Virtual Outcrop length: 2800 m

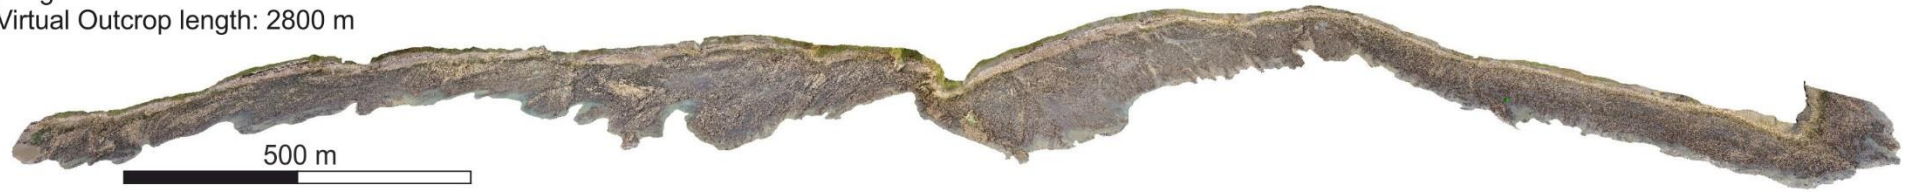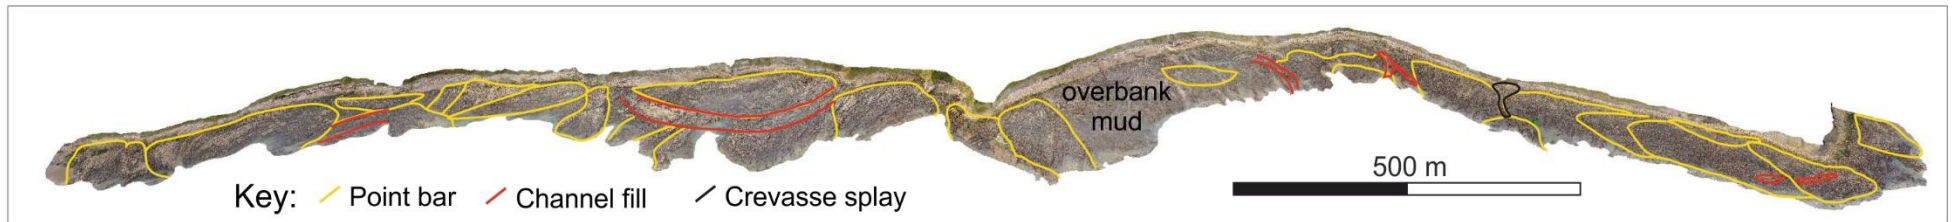

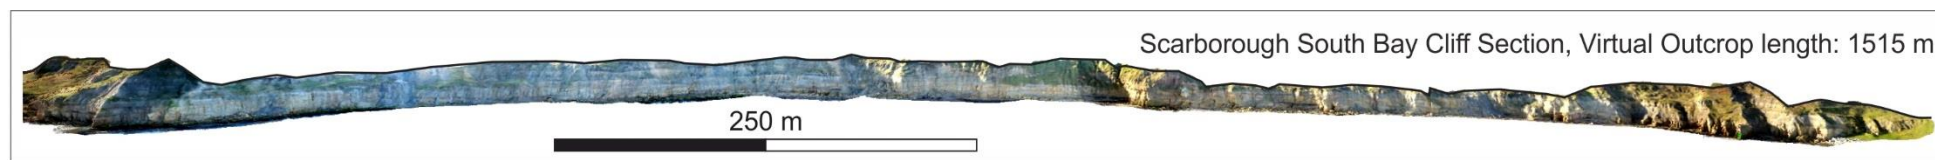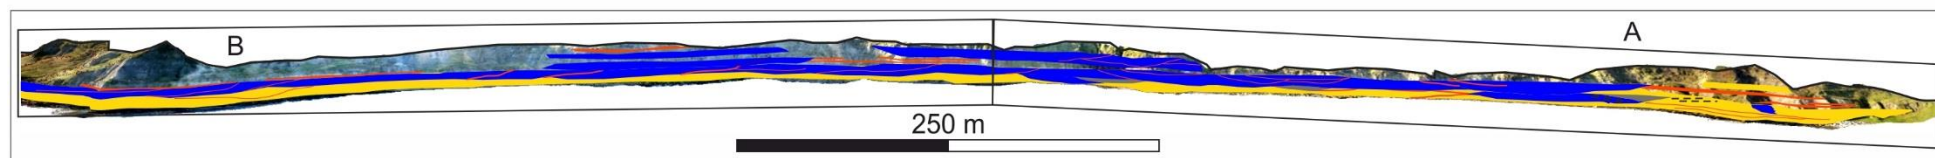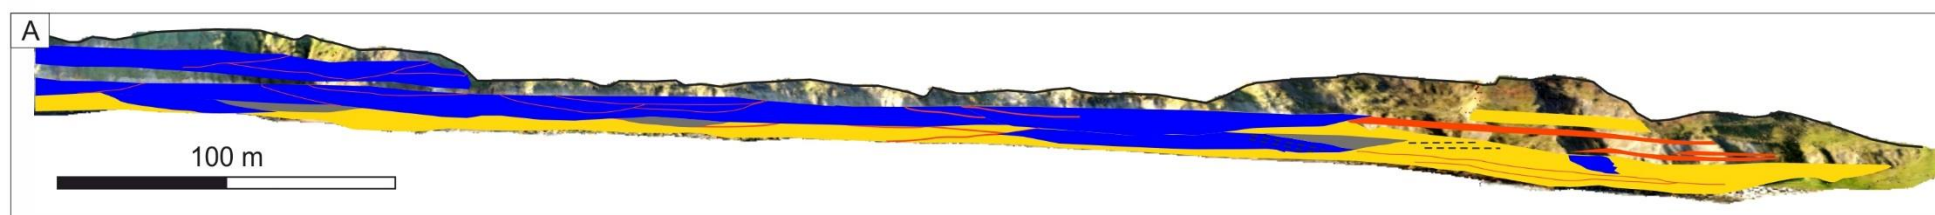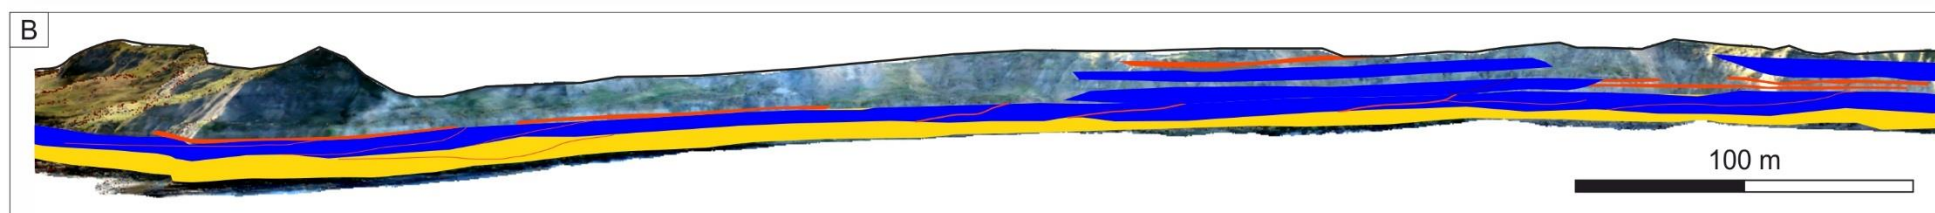

Key: Accretion surface Bar boundary Storey surface Sandstone dominated channel deposits Tidally influenced heterolithic deposits  
 Crevasse splay & crevasse channel deposits Mudstone dominated channel deposits
